# Supplementary material for: Configurationally stable dithia[7]helicene and dithia-quasi[8]circulene fused dithiolones
Source: Royal Society of Chemistry journal article supplement (doi:10.1039/d2qo00921h), 2022-01-01
Supplement: d2qo00921h2.pdf [file d2qo00921h2.pdf]

# Molecular Calculation Report generated by quchemreport

February 9, 2022

## 1 MOLECULE

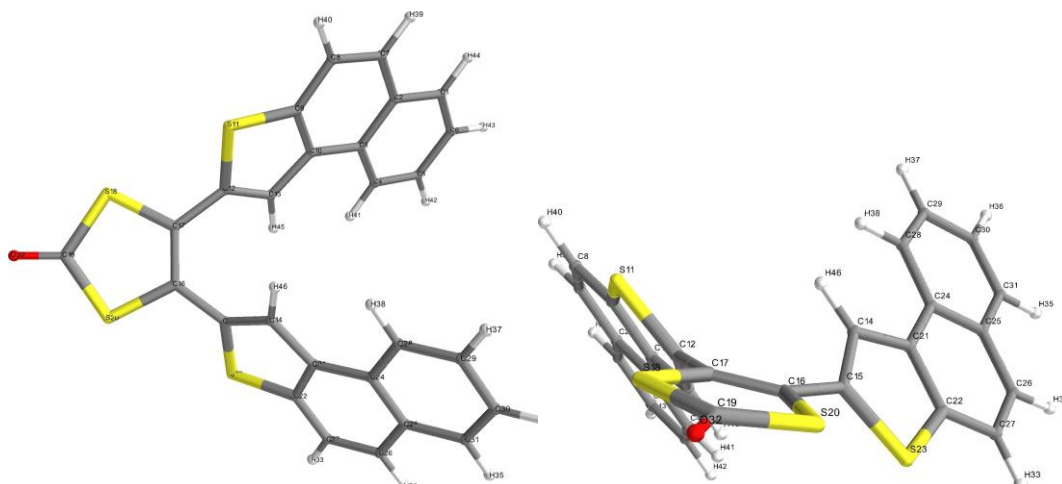

Figure 1: Chemical structure diagram with atomic numbering from two points of view.

Directory name           4  
Formula                 C<sub>27</sub>H<sub>14</sub>O<sub>4</sub>  
Charge                  0  
Spin multiplicity       1

## 2 COMPUTATIONAL DETAILS

|                                                         |               |               |
|---------------------------------------------------------|---------------|---------------|
| Software                                                | Gaussian      | (2009+D.01)   |
| Computational method                                    | DFT           |               |
| Functional                                              | PBE1PBE       |               |
| Basis set name                                          | 6-311+G(2d,p) |               |
| Number of basis set functions                           | 980           |               |
| Closed shell calculation                                | True          |               |
| Requested SCF convergence on RMS and Max density matrix | 1e-08         | 1e-06         |
| Requested SCF convergence on energy                     | 1e-06         |               |
| Job type: Geometry optimization                         |               |               |
| Max Force value and threshold                           | 0.000038      | 0.000450      |
| RMS Force value and threshold                           | 0.000006      | 0.000300      |
| Max Displacement value and threshold                    | 0.001432      | 0.001800      |
| RMS Displacement value and threshold                    | 0.000288      | 0.001200      |
| Job type: Frequency and thermochemical analysis         |               |               |
| Temperature                                             | 298.15 K      |               |
| Anharmonic effects                                      | None          |               |
| Anharmonic effects                                      | None          |               |
| Job type: Time-dependent calculation                    |               |               |
| Number of calculated excited states and spin state      | 20            | ['Singlet-A'] |

## 3 RESULTS

|                        |                      |
|------------------------|----------------------|
| Total molecular energy | -2703.83854 hartrees |
| HOMO number            | 124                  |
| LUMO+1 energies        | -1.50 eV             |
| LUMO energies          | -2.12 eV             |

|                                                |                      |
|------------------------------------------------|----------------------|
| HOMO energies                                  | -5.98 eV             |
| HOMO-1 energies                                | -6.51 eV             |
| Geometry optimization specific results         |                      |
| Converged nuclear repulsion energy             | 3605.14873 Hartrees  |
| Frequency and Thermochemistry specific results |                      |
| Enthalpy at 298.15 K                           | -2703.48465 Hartrees |
| Gibbs free energy at 298.15 K                  | -2703.56855 Hartrees |
| Entropy at 298.15 K                            | 0.00028 Hartrees     |

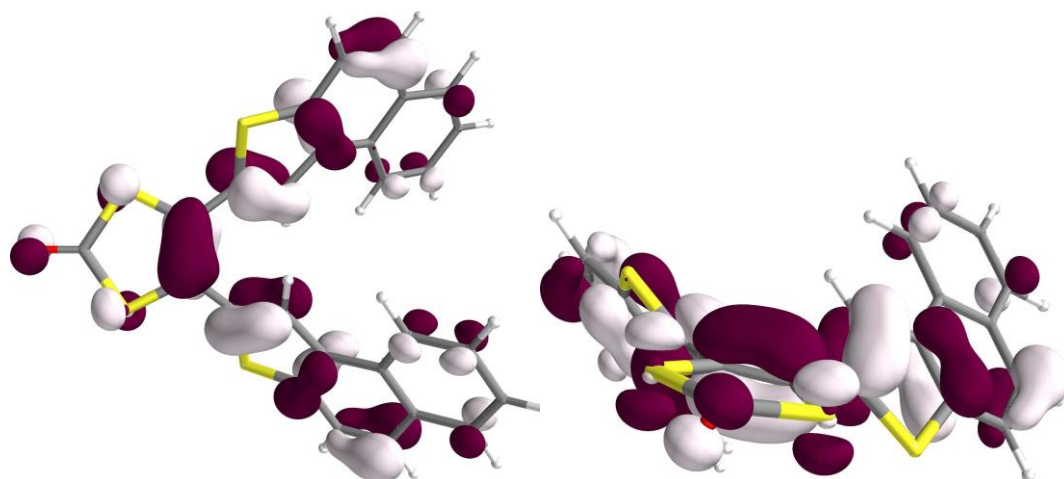

Figure 2: Representation of the HOMO from two points of view.

Table. Most intense (> 50 km/mol) molecular vibrations in wavenumbers

| Frequencies | Intensity | Symmetry |
|-------------|-----------|----------|
| 1782        | 895       | A        |
| 1150        | 61        | A        |
| 870         | 70        | A        |
| 818         | 77        | A        |

Table. Results concerning the calculated mono-electronic excitations.

| E.S. | Symmetry  | nm  | cm <sup>-1</sup> | <i>f</i> | R      | Λ    | <i>d</i> <sub>CT</sub> | <i>q</i> <sub>CT</sub> | Excitation description : initial OM - ending OM (% if > 5%)                             |
|------|-----------|-----|------------------|----------|--------|------|------------------------|------------------------|-----------------------------------------------------------------------------------------|
| 1    | Singlet-A | 393 | 25419            | 0.301    | 147.9  | 0.78 | 96.57                  | 0.43                   | 124-125(97);                                                                            |
| 2    | Singlet-A | 332 | 30063            | 0.040    | -16.5  | 0.67 | 273.41                 | 0.44                   | 123-125(74); 124-126(21);                                                               |
| 3    | Singlet-A | 318 | 31358            | 0.013    | 11.0   | 0.63 | 124.85                 | 0.34                   | 122-125(31); 124-127(40); 124-128(15);                                                  |
| 4    | Singlet-A | 317 | 31541            | 0.316    | -122.1 | 0.70 | 195.72                 | 0.37                   | 123-125(21); 124-126(73);                                                               |
| 5    | Singlet-A | 315 | 31649            | 0.017    | 100.3  | 0.61 | 261.31                 | 0.37                   | 122-125(52); 124-127(7); 124-128(22); 124-131(6);                                       |
| 6    | Singlet-A | 310 | 32217            | 0.011    | -32.3  | 0.59 | 238.26                 | 0.46                   | 121-125(78); 124-130(10);                                                               |
| 7    | Singlet-A | 296 | 33674            | 0.011    | 4.8    | 0.62 | 90.89                  | 0.47                   | 124-127(44); 124-128(41);                                                               |
| 8    | Singlet-A | 294 | 33922            | 0.009    | -7.0   | 0.64 | 42.49                  | 0.50                   | 120-125(83); 124-128(10);                                                               |
| 9    | Singlet-A | 291 | 34318            | 0.024    | 17.5   | 0.38 | 519.30                 | 0.82                   | 124-129(95);                                                                            |
| 10   | Singlet-A | 283 | 35302            | 0.004    | 14.1   | 0.71 | 72.05                  | 0.24                   | 121-126(12); 122-127(7); 123-126(52); 124-131(14);                                      |
| 11   | Singlet-A | 282 | 35373            | 0.000    | -2.5   | 0.60 | 177.27                 | 0.29                   | 121-125(16); 121-127(7); 122-126(35); 124-130(28);                                      |
| 12   | Singlet-A | 280 | 35668            | 0.043    | 5.9    | 0.66 | 133.74                 | 0.23                   | 121-126(17); 123-126(39); 124-131(20);                                                  |
| 13   | Singlet-A | 267 | 37325            | 0.009    | -16.2  | 0.64 | 92.46                  | 0.40                   | 123-127(17); 124-132(66);                                                               |
| 14   | Singlet-A | 267 | 37382            | 0.004    | -5.2   | 0.64 | 92.75                  | 0.41                   | 123-127(59); 124-130(13); 124-132(13);                                                  |
| 15   | Singlet-A | 259 | 38534            | 0.066    | 382.3  | 0.55 | 133.85                 | 0.31                   | 121-126(15); 122-127(10); 124-131(42);                                                  |
| 16   | Singlet-A | 258 | 38652            | 0.131    | -422.4 | 0.62 | 357.60                 | 0.31                   | 122-126(36); 123-127(7); 123-131(6); 124-130(40);                                       |
| 17   | Singlet-A | 257 | 38832            | 0.010    | -12.7  | 0.52 | 421.75                 | 0.58                   | 123-128(76);                                                                            |
| 18   | Singlet-A | 256 | 39025            | 0.026    | 1.3    | 0.54 | 136.64                 | 0.35                   | 119-125(8); 120-127(6); 120-128(13); 121-126(12); 122-127(10); 122-128(12); 124-133(8); |
| 19   | Singlet-A | 254 | 39260            | 0.004    | 2.7    | 0.56 | 404.22                 | 0.54                   | 120-126(88);                                                                            |
| 20   | Singlet-A | 254 | 39369            | 0.036    | -57.0  | 0.60 | 86.48                  | 0.37                   | 119-125(63); 124-131(7);                                                                |

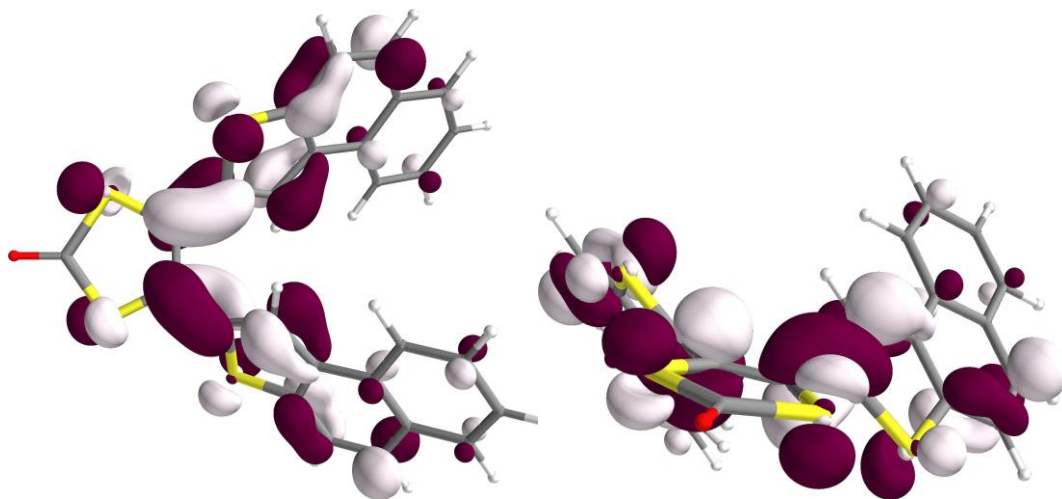

Figure 3: Representation of the LUMO from two points of view.

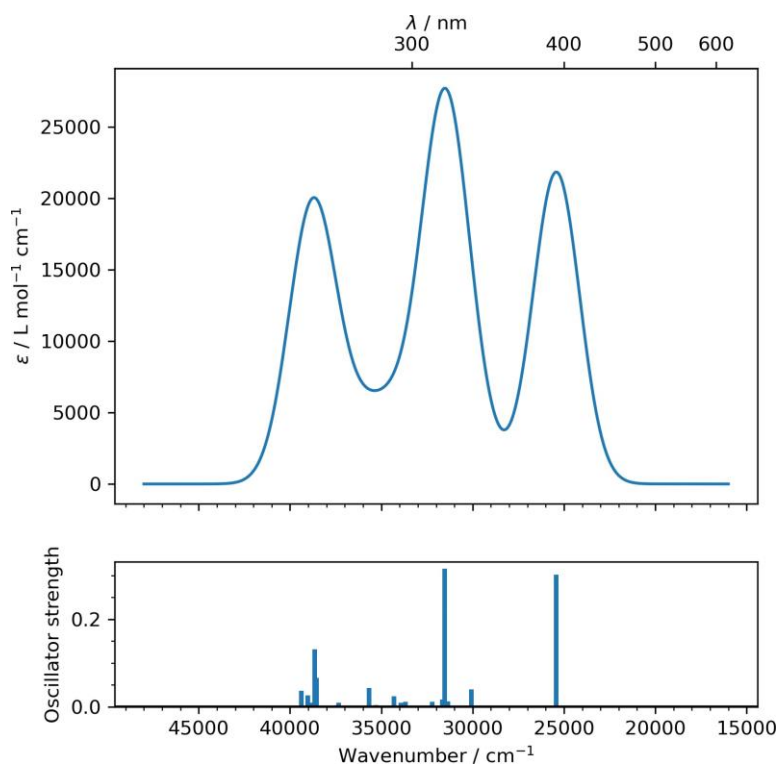

Figure 4: Calculated UV visible Absorption spectrum with a gaussian broadening (FWHM = 3000 cm<sup>-1</sup>)

Table. Converged cartesian atomic coordinates in Angstroms

| Atom | X       | Y       | Z       |
|------|---------|---------|---------|
| C    | -3.8839 | -4.2391 | -0.8134 |
| C    | -2.6541 | -3.8978 | -0.2144 |
| C    | -1.8561 | -2.8854 | -0.8117 |
| C    | -2.3208 | -2.2550 | -1.9814 |
| C    | -3.5223 | -2.6095 | -2.5414 |
| C    | -4.3121 | -3.6103 | -1.9537 |
| C    | -2.2086 | -4.5492 | 0.9698  |
| C    | -1.0230 | -4.2291 | 1.5612  |
| C    | -0.2308 | -3.2244 | 0.9739  |
| C    | -0.6136 | -2.5521 | -0.1876 |
| S    | 1.2945  | -2.6621 | 1.5604  |
| C    | 1.4294  | -1.5235 | 0.2473  |
| C    | 0.3554  | -1.5915 | -0.5875 |
| C    | 0.3549  | 1.5916  | 0.5875  |
| C    | 1.4287  | 1.5238  | -0.2476 |
| C    | 2.5962  | 0.6636  | -0.1362 |
| C    | 2.5965  | -0.6628 | 0.1357  |
| S    | 4.1572  | -1.4351 | 0.3144  |
| C    | 5.1592  | 0.0011  | 0.0003  |
| S    | 4.1565  | 1.4366  | -0.3145 |
| C    | -0.6145 | 2.5519  | 0.1876  |

|   |         |         |         |
|---|---------|---------|---------|
| C | -0.2322 | 3.2241  | -0.9741 |
| S | 1.2932  | 2.6622  | -1.5609 |
| C | -1.8570 | 2.8849  | 0.8119  |
| C | -2.6553 | 3.8970  | 0.2146  |
| C | -2.2103 | 4.5484  | -0.9698 |
| C | -1.0248 | 4.2285  | -1.5615 |
| C | -2.3214 | 2.2543  | 1.9816  |
| C | -3.5230 | 2.6085  | 2.5418  |
| C | -4.3131 | 3.6091  | 1.9541  |
| C | -3.8852 | 4.2380  | 0.8138  |
| O | 6.3538  | 0.0014  | 0.0005  |
| H | -0.6973 | 4.7339  | -2.4628 |
| H | -2.8400 | 5.3190  | -1.4024 |
| H | -4.4918 | 5.0120  | 0.3539  |
| H | -5.2614 | 3.8819  | 2.4037  |
| H | -3.8655 | 2.1113  | 3.4427  |
| H | -1.7227 | 1.4773  | 2.4435  |
| H | -2.8380 | -5.3201 | 1.4025  |
| H | -0.6951 | -4.7347 | 2.4623  |
| H | -1.7223 | -1.4779 | -2.4435 |
| H | -3.8651 | -2.1125 | -3.4424 |
| H | -5.2605 | -3.8834 | -2.4032 |
| H | -4.4903 | -5.0133 | -0.3535 |
| H | 0.2744  | -0.9652 | -1.4661 |
| H | 0.2741  | 0.9651  | 1.4659  |

---

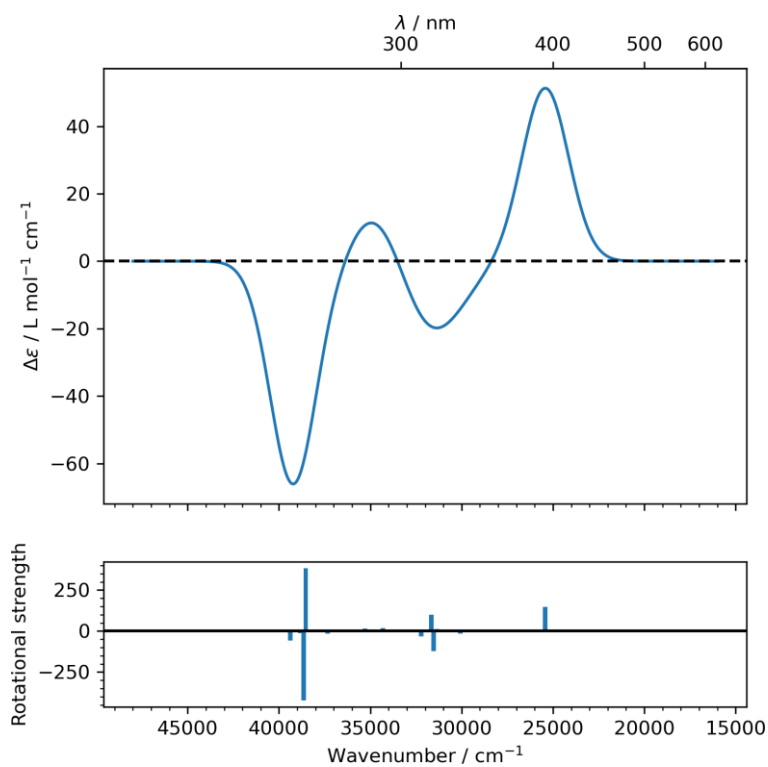

Figure 5: Calculated Circular Dichroism spectrum with a gaussian broadening (FWHM = 3000  $\text{cm}^{-1}$ )

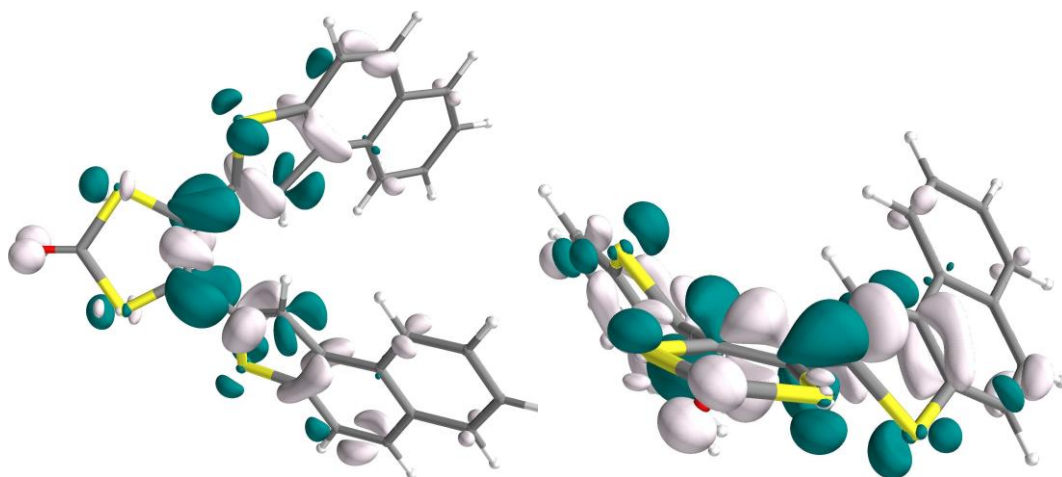

Figure 6: Representation of the Electron Density Difference (S1-S0) from two points of view.

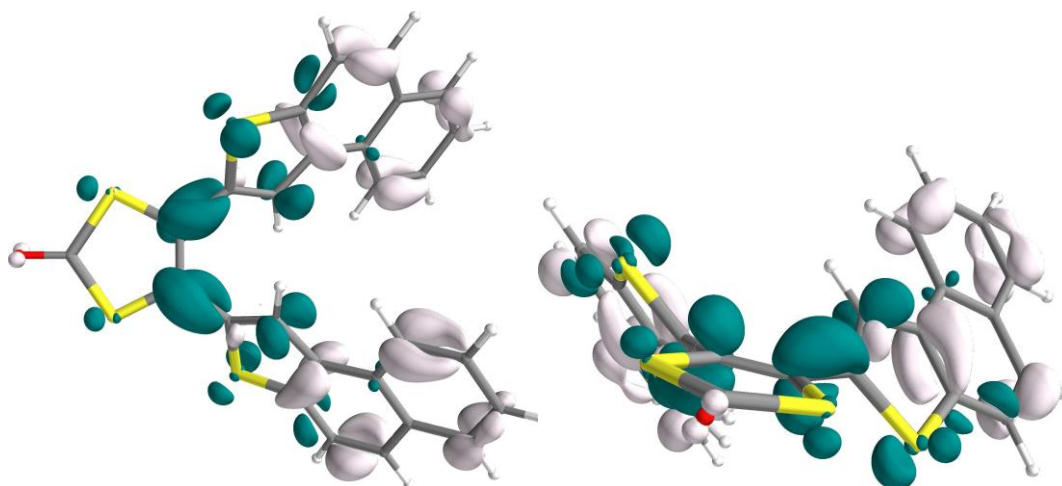

Figure 7: Representation of the Electron Density Difference (S2-S0) from two points of view.

# Molecular Calculation Report generated by quchemreport

February 9, 2022

## 1 MOLECULE

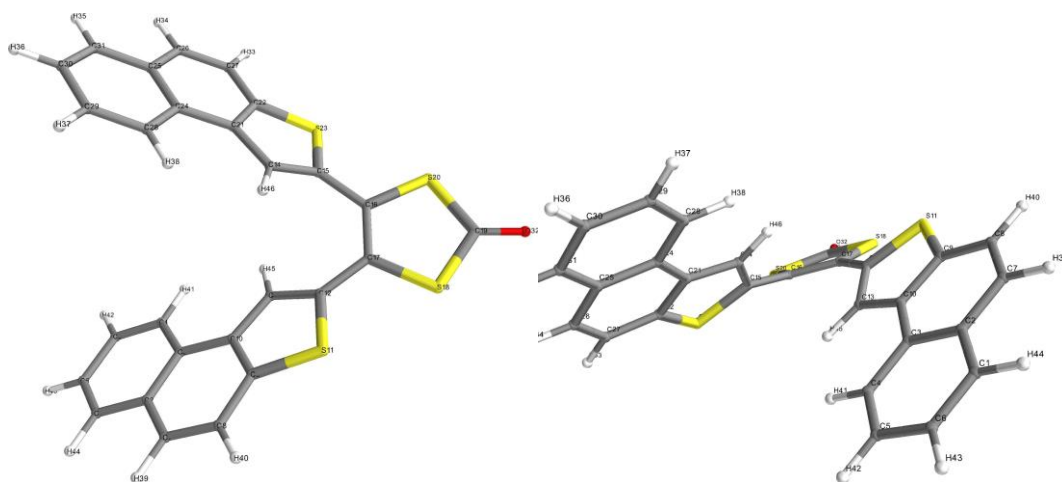

Figure 1: Chemical structure diagram with atomic numbering from two points of view.

Directory name            4-cat  
Formula                    C27H14OS4+  
Charge                     1  
Spin multiplicity        2

## 2 COMPUTATIONAL DETAILS

|                                                         |               |                                                                                                                                                                                                                                         |
|---------------------------------------------------------|---------------|-----------------------------------------------------------------------------------------------------------------------------------------------------------------------------------------------------------------------------------------|
| Software                                                | Gaussian      | (2009+D.01)                                                                                                                                                                                                                             |
| Computational method                                    | DFT           |                                                                                                                                                                                                                                         |
| Functional                                              | PBE1PBE       |                                                                                                                                                                                                                                         |
| Basis set name                                          | 6-311+G(2d,p) |                                                                                                                                                                                                                                         |
| Number of basis set functions                           | 980           |                                                                                                                                                                                                                                         |
| Closed shell calculation                                | False         |                                                                                                                                                                                                                                         |
| Requested SCF convergence on RMS and Max density matrix | 1e-08         | 1e-06                                                                                                                                                                                                                                   |
| Requested SCF convergence on energy                     | 1e-06         |                                                                                                                                                                                                                                         |
| Job type: Geometry optimization                         |               |                                                                                                                                                                                                                                         |
| Max Force value and threshold                           | 0.000004      | 0.000450                                                                                                                                                                                                                                |
| RMS Force value and threshold                           | 0.000001      | 0.000300                                                                                                                                                                                                                                |
| Max Displacement value and threshold                    | 0.000315      | 0.001800                                                                                                                                                                                                                                |
| RMS Displacement value and threshold                    | 0.000063      | 0.001200                                                                                                                                                                                                                                |
| Job type: Frequency and thermochemical analysis         |               |                                                                                                                                                                                                                                         |
| Temperature                                             | 298.15 K      |                                                                                                                                                                                                                                         |
| Anharmonic effects                                      | None          |                                                                                                                                                                                                                                         |
| Anharmonic effects                                      | None          |                                                                                                                                                                                                                                         |
| Job type: Time-dependent calculation                    |               |                                                                                                                                                                                                                                         |
| Number of calculated excited states and spin state      | 20            | ['2.019-A' '2.042-A'<br>'2.043-A' '2.048-A'<br>'2.062-A' '2.085-A'<br>'2.105-A'<br>'2.134-A' '2.178-A'<br>'2.206-A' '2.309-A'<br>'2.348-A' '2.408-A'<br>'2.427-A'<br>'3.137-A' '3.143-A'<br>'3.173-A' '3.179-A'<br>'3.197-A' '3.258-A'] |

### 3 RESULTS

|                          |                      |              |
|--------------------------|----------------------|--------------|
| Total molecular energy   | -2703.58821 hartrees |              |
| Unrestricted calculation | Alpha spin MO        | Beta spin MO |
| HOMO number              | 124                  | 123          |
| LUMO+1 energies          | -4.62 eV             | -5.62 eV     |
| LUMO energies            | -5.91 eV             | -7.66 eV     |
| HOMO energies            | -9.00 eV             | -9.27 eV     |
| HOMO-1 energies          | -9.57 eV             | -9.78 eV     |

Geometry optimization specific results  
Converged nuclear repulsion energy 3613.73041 Hartrees

Frequency and Thermochemistry specific results  
Enthalpy at 298.15 K -2703.23427 Hartrees  
Gibbs free energy at 298.15 K -2703.31765 Hartrees  
Entropy at 298.15 K 0.00028 Hartrees

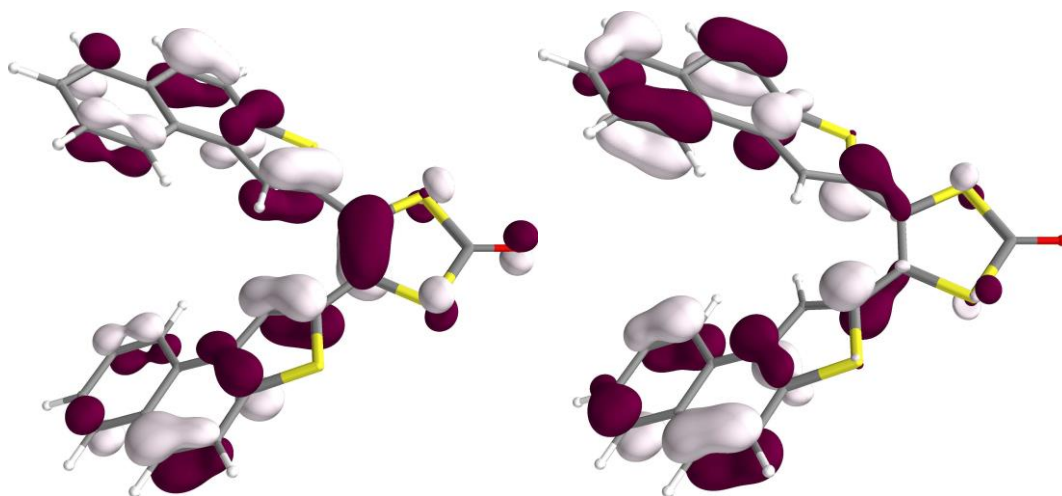

Figure 2: Representation of the HOMO of spin alpha (left) and spin beta (right).

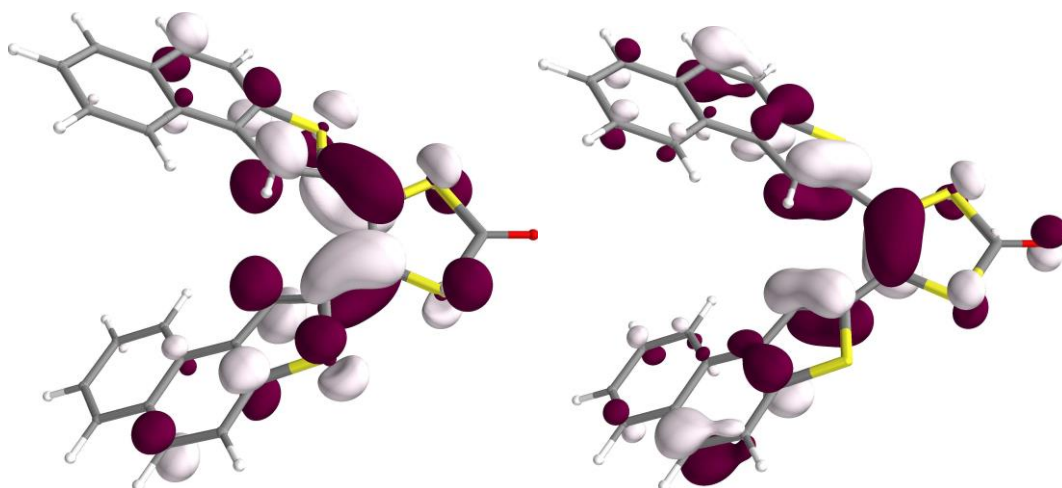

Figure 3: Representation of the LUMO of spin alpha (left) and spin beta (right).

Table. Most intense (&gt; 50 km/mol) molecular vibrations in wavenumbers

| Frequencies | Intensity | Symmetry |
|-------------|-----------|----------|
| 1829        | 944       | A        |
| 1626        | 195       | A        |
| 1618        | 532       | A        |
| 1592        | 64        | A        |
| 1564        | 100       | A        |
| 1558        | 315       | A        |
| 1516        | 374       | A        |
| 1481        | 50        | A        |
| 1469        | 95        | A        |
| 1406        | 519       | A        |
| 1405        | 330       | A        |
| 1378        | 1152      | A        |
| 1280        | 138       | A        |
| 1228        | 495       | A        |
| 1181        | 82        | A        |
| 1158        | 273       | A        |
| 857         | 111       | A        |
| 834         | 60        | A        |

Table. Results concerning the calculated mono-electronic excitations.

| E.S. | Symmetry | nm   | cm <sup>-1</sup> | <i>f</i> | R      | Λ    | d <sub>CT</sub> | q <sub>CT</sub> | Excitation description : initial OM - ending OM (% if > 5%)                            |
|------|----------|------|------------------|----------|--------|------|-----------------|-----------------|----------------------------------------------------------------------------------------|
| 1    | 2.019-A  | 1228 | 8140             | 0.129    | 71.5   | 0.63 | 364.62          | 0.63            | 123b-124b (96)                                                                         |
| 2    | 2.043-A  | 992  | 10077            | 0.004    | 33.1   | 0.62 | 349.96          | 0.59            | 121b-124b (26) 122b-124b (71)                                                          |
| 3    | 2.048-A  | 916  | 10906            | 0.001    | 26.4   | 0.54 | 383.61          | 0.65            | 120b-124b (96)                                                                         |
| 4    | 2.042-A  | 829  | 12048            | 0.114    | -121.4 | 0.64 | 269.57          | 0.58            | 121b-124b (70) 122b-124b (25)                                                          |
| 5    | 2.105-A  | 613  | 16295            | 0.159    | 218.0  | 0.70 | 269.88          | 0.46            | 124a-125a (77) 119b-124b (8)                                                           |
| 6    | 2.206-A  | 544  | 18368            | 0.003    | 13.0   | 0.69 | 223.53          | 0.48            | 118b-124b (87)                                                                         |
| 7    | 2.062-A  | 540  | 18512            | 0.054    | -46.1  | 0.66 | 343.29          | 0.53            | 124a-125a (8) 119b-124b (87)                                                           |
| 8    | 3.197-A  | 508  | 19677            | 0.008    | -0.3   | 0.67 | 158.24          | 0.35            | 123a-125a (22) 124a-126a (8) 118b-124b (8) 123b-125b (43)                              |
| 9    | 2.085-A  | 473  | 21118            | 0.002    | 4.4    | 0.38 | 576.98          | 0.79            | 117b-124b (95)                                                                         |
| 10   | 3.258-A  | 435  | 22957            | 0.003    | -1.1   | 0.61 | 73.40           | 0.30            | 120a-125a (18) 123a-126a (9) 124a-128a (7) 121b-125b (19) 122b-125b (6) 123b-126b (10) |
| 11   | 2.408-A  | 426  | 23462            | 0.009    | 8.7    | 0.59 | 195.87          | 0.60            | 122a-125a (15) 116b-124b (75)                                                          |
| 12   | 3.179-A  | 422  | 23695            | 0.009    | -2.8   | 0.56 | 332.06          | 0.56            | 122a-125a (48) 116b-124b (14) 122b-125b (18)                                           |
| 13   | 2.348-A  | 414  | 24098            | 0.000    | -0.7   | 0.64 | 23.96           | 0.46            | 121a-125a (10) 123a-125a (6) 115b-124b (73)                                            |
| 14   | 3.137-A  | 409  | 24393            | 0.002    | 5.5    | 0.53 | 338.55          | 0.59            | 121a-125a (49) 115b-124b (19) 120b-125b (15)                                           |
| 15   | 2.178-A  | 400  | 24943            | 0.199    | -136.4 | 0.64 | 370.59          | 0.49            | 123a-125a (56) 123b-125b (28)                                                          |
| 16   | 3.173-A  | 385  | 25920            | 0.048    | -25.0  | 0.64 | 69.14           | 0.26            | 123a-128a (10) 124a-126a (19) 123b-125b (12) 123b-128b (13)                            |
| 17   | 2.427-A  | 383  | 26086            | 0.019    | -12.5  | 0.62 | 320.18          | 0.44            | 114b-124b (73)                                                                         |
| 18   | 3.143-A  | 376  | 26588            | 0.008    | -1.5   | 0.64 | 33.15           | 0.29            | 120a-125a (17) 114b-124b (18) 121b-125b (6) 122b-125b (8) 123b-126b (6)                |
| 19   | 2.134-A  | 364  | 27405            | 0.022    | 7.3    | 0.54 | 471.94          | 0.59            | 122a-125a (24) 121b-125b (12) 122b-125b (53)                                           |
| 20   | 2.309-A  | 356  | 28060            | 0.002    | 4.9    | 0.61 | 93.20           | 0.39            | 121a-125a (14) 113b-124b (24) 120b-125b (38)                                           |

Table. Converged cartesian atomic coordinates in Angstroms

| Atom | X       | Y      | Z       |
|------|---------|--------|---------|
| C    | 3.8726  | 4.2403 | -0.8894 |
| C    | 2.6162  | 3.9399 | -0.3292 |
| C    | 1.9060  | 2.8002 | -0.7897 |
| C    | 2.4773  | 2.0022 | -1.7893 |
| C    | 3.7076  | 2.3204 | -2.3214 |
| C    | 4.4105  | 3.4439 | -1.8706 |
| C    | 2.0579  | 4.7634 | 0.6855  |
| C    | 0.8358  | 4.5054 | 1.2516  |
| C    | 0.1273  | 3.3887 | 0.8008  |
| C    | 0.6278  | 2.5258 | -0.1954 |
| S    | -1.4285 | 2.8887 | 1.3643  |
| C    | -1.4192 | 1.5168 | 0.2925  |



|   |         |         |         |
|---|---------|---------|---------|
| C | -0.2602 | 1.4787  | -0.4706 |
| C | -0.2606 | -1.4787 | 0.4706  |
| C | -1.4195 | -1.5165 | -0.2925 |
| C | -2.5621 | -0.6687 | -0.1924 |
| C | -2.5619 | 0.6692  | 0.1924  |
| S | -4.1113 | 1.4017  | 0.4812  |
| C | -5.1134 | 0.0006  | -0.0000 |
| S | -4.1117 | -1.4008 | -0.4812 |
| C | 0.6273  | -2.5259 | 0.1954  |
| C | 0.1265  | -3.3888 | -0.8007 |
| S | -1.4292 | -2.8885 | -1.3642 |
| C | 1.9054  | -2.8006 | 0.7896  |
| C | 2.6154  | -3.9404 | 0.3292  |
| C | 2.0568  | -4.7639 | -0.6854 |
| C | 0.8348  | -4.5058 | -1.2515 |
| C | 2.4769  | -2.0026 | 1.7892  |
| C | 3.7071  | -2.3211 | 2.3212  |
| C | 4.4098  | -3.4447 | 1.8705  |
| C | 3.8717  | -4.2411 | 0.8894  |
| O | -6.2978 | 0.0007  | -0.0000 |
| H | 0.4281  | -5.1550 | -2.0175 |
| H | 2.6224  | -5.6300 | -1.0133 |
| H | 4.4090  | -5.1143 | 0.5345  |
| H | 5.3762  | -3.6850 | 2.2981  |
| H | 4.1340  | -1.6967 | 3.0980  |
| H | 1.9499  | -1.1283 | 2.1541  |
| H | 2.6237  | 5.6293  | 1.0135  |
| H | 0.4294  | 5.1547  | 2.0178  |
| H | 1.9500  | 1.1279  | -2.1542 |
| H | 4.1343  | 1.6959  | -3.0982 |
| H | 5.3769  | 3.6840  | -2.2982 |
| H | 4.4101  | 5.1134  | -0.5345 |
| H | -0.1055 | 0.7328  | -1.2377 |
| H | -0.1056 | -0.7327 | 1.2376  |

---

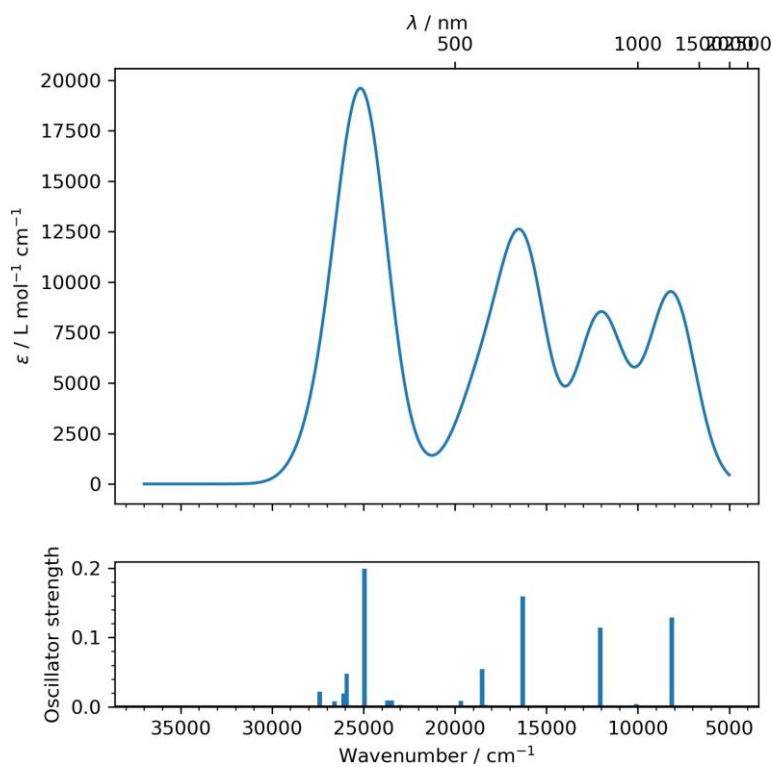

Figure 4: Calculated UV visible Absorption spectrum with a gaussian broadening (FWHM = 3000  $\text{cm}^{-1}$ )

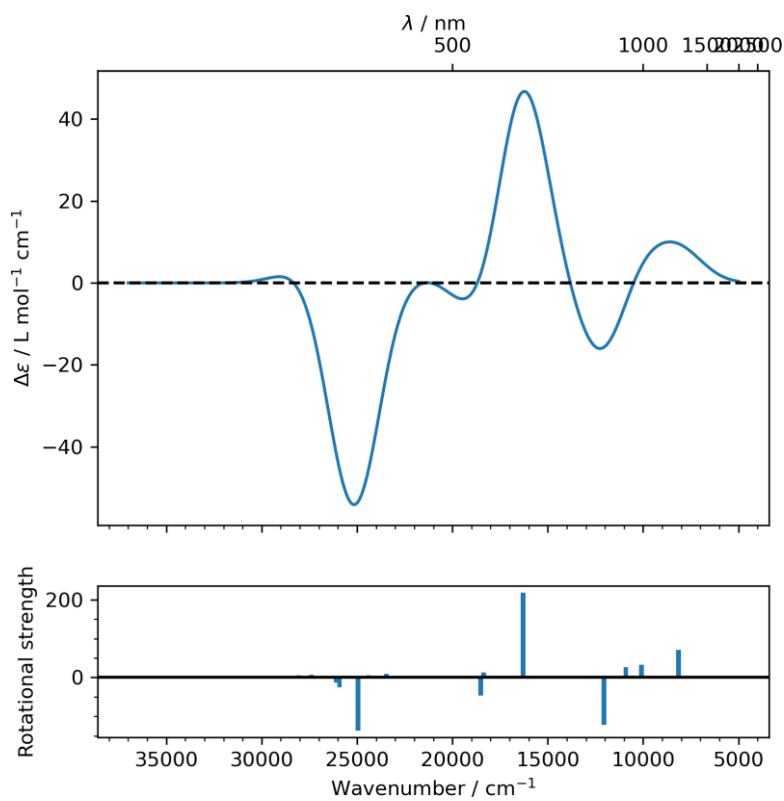

Figure 5: Calculated Circular Dichroism spectrum with a gaussian broadening (FWHM = 3000  $\text{cm}^{-1}$ )

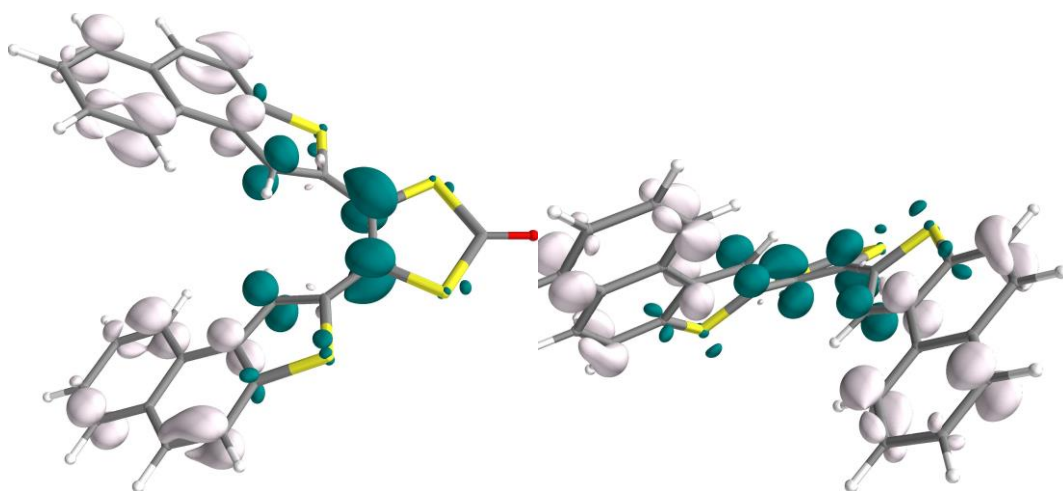

Figure 6: Representation of the Electron Density Difference (ES1-GS) from two points of view.

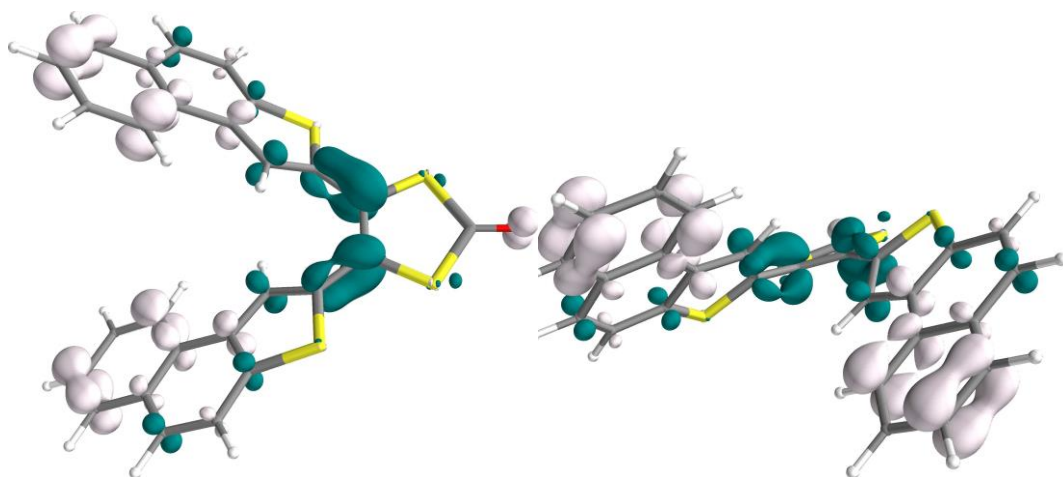

Figure 7: Representation of the Electron Density Difference (ES2-GS) from two points of view.

# Molecular Calculation Report generated by quchemreport

February 9, 2022

## 1 MOLECULE

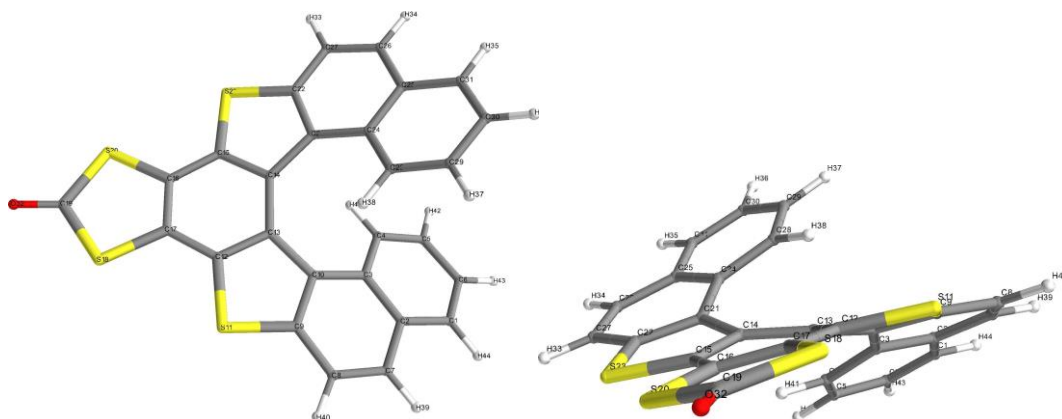

Figure 1: Chemical structure diagram with atomic numbering from two points of view.

Directory name 1-dTH-M  
Formula C27H12OS4  
Charge 0  
Spin multiplicity 1

## 2 COMPUTATIONAL DETAILS

|                                                         |               |               |
|---------------------------------------------------------|---------------|---------------|
| Software                                                | Gaussian      | (2009+D.01)   |
| Computational method                                    | DFT           |               |
| Functional                                              | PBE1PBE       |               |
| Basis set name                                          | 6-311+G(2d,p) |               |
| Number of basis set functions                           | 968           |               |
| Closed shell calculation                                | True          |               |
| Requested SCF convergence on RMS and Max density matrix | 1e-08         | 1e-06         |
| Requested SCF convergence on energy                     | 1e-06         |               |
| Job type: Geometry optimization                         |               |               |
| Max Force value and threshold                           | 0.000083      | 0.000450      |
| RMS Force value and threshold                           | 0.000010      | 0.000300      |
| Max Displacement value and threshold                    | 0.001429      | 0.001800      |
| RMS Displacement value and threshold                    | 0.000365      | 0.001200      |
| Job type: Frequency and thermochemical analysis         |               |               |
| Temperature                                             | 298.15 K      |               |
| Anharmonic effects                                      | None          |               |
| Anharmonic effects                                      | None          |               |
| Job type: Time-dependent calculation                    |               |               |
| Number of calculated excited states and spin state      | 40            | ['Singlet-A'] |

## 3 RESULTS

|                        |                      |
|------------------------|----------------------|
| Total molecular energy | -2702.65945 hartrees |
| HOMO number            | 123                  |
| LUMO+1 energies        | -1.46 eV             |
| LUMO energies          | -2.22 eV             |
| HOMO energies          | -5.98 eV             |
| HOMO-1 energies        | -6.29 eV             |

Geometry optimization specific results

Converged nuclear repulsion energy

3746.02588 Hartrees

Frequency and Thermochemistry specific results

Enthalpy at 298.15 K

-2702.32747 Hartrees

Gibbs free energy at 298.15 K

-2702.40424 Hartrees

Entropy at 298.15 K

0.00026 Hartrees

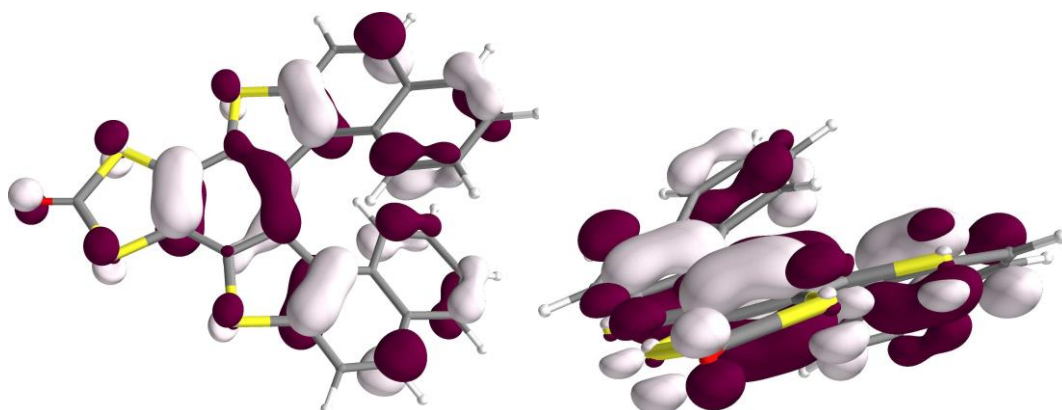

Figure 2: Representation of the HOMO from two points of view.

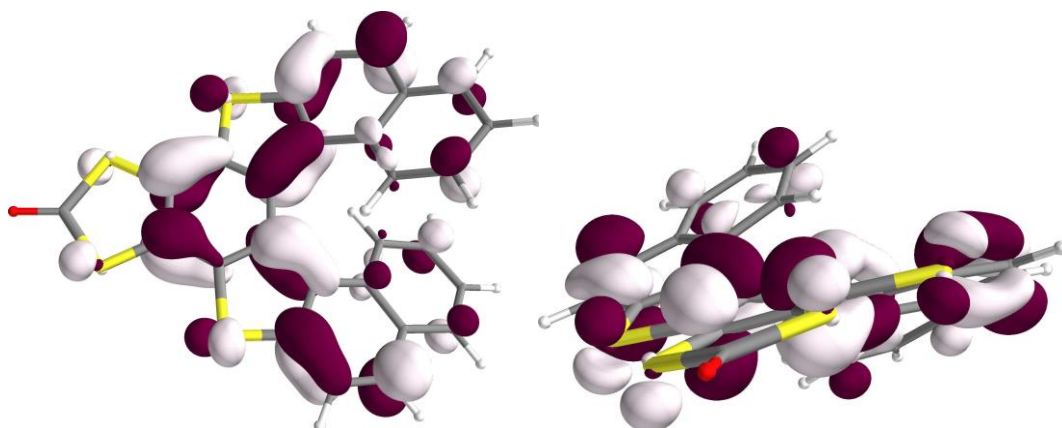

Figure 3: Representation of the LUMO from two points of view.

Table. Most intense (> 50 km/mol) molecular vibrations in wavenumbers

| Frequencies | Intensity | Symmetry |
|-------------|-----------|----------|
| 1794        | 932       | A        |
| 1367        | 94        | A        |
| 820         | 78        | A        |

Table. First five calculated mono-electronic excitations and those with  $f > 0.1$  or  $R > 10$ .

| E.S. | Symmetry  | nm  | cm <sup>-1</sup> | $f$   | R      | $\Lambda$ | $d_{CT}$ | $q_{CT}$ | Excitation description : initial OM - ending OM (% if > 5%)        |
|------|-----------|-----|------------------|-------|--------|-----------|----------|----------|--------------------------------------------------------------------|
| 1    | Singlet-A | 399 | 25046            | 0.173 | -77.2  | 0.78      | 18.80    | 0.41     | 123-124(96);                                                       |
| 2    | Singlet-A | 370 | 26960            | 0.129 | 80.6   | 0.73      | 18.82    | 0.45     | 122-124(87);                                                       |
| 3    | Singlet-A | 332 | 30100            | 0.019 | 11.7   | 0.71      | 189.54   | 0.46     | 121-124(79); 123-125(16);                                          |
| 4    | Singlet-A | 330 | 30275            | 0.010 | -15.7  | 0.46      | 420.22   | 0.73     | 123-126(89);                                                       |
| 5    | Singlet-A | 320 | 31187            | 0.117 | -42.0  | 0.75      | 181.00   | 0.35     | 121-124(14); 123-125(80);                                          |
| 6    | Singlet-A | 314 | 31837            | 0.023 | -165.9 | 0.61      | 13.53    | 0.37     | 119-124(12); 120-124(40); 122-125(30);<br>123-129(8);              |
| 9    | Singlet-A | 296 | 33680            | 0.004 | -14.2  | 0.59      | 105.75   | 0.46     | 119-124(70); 122-125(23);                                          |
| 10   | Singlet-A | 294 | 33988            | 0.167 | 139.6  | 0.63      | 366.79   | 0.50     | 123-127(78);                                                       |
| 11   | Singlet-A | 287 | 34768            | 0.112 | 107.5  | 0.62      | 348.22   | 0.32     | 118-124(11); 120-125(10); 123-128(44);<br>123-131(8);              |
| 12   | Singlet-A | 280 | 35708            | 0.007 | 16.3   | 0.64      | 321.32   | 0.33     | 118-124(27); 123-128(38); 123-131(21);                             |
| 13   | Singlet-A | 278 | 35879            | 0.032 | -106.6 | 0.65      | 113.57   | 0.35     | 121-125(18); 122-127(44); 123-129(17);<br>123-130(15);             |
| 14   | Singlet-A | 278 | 35969            | 0.007 | -18.3  | 0.64      | 193.71   | 0.30     | 121-125(39); 123-129(35);                                          |
| 15   | Singlet-A | 273 | 36505            | 0.071 | -412.4 | 0.65      | 112.66   | 0.39     | 122-127(9); 122-128(8); 123-129(7); 123-<br>130(62);               |
| 17   | Singlet-A | 269 | 37116            | 0.010 | 17.9   | 0.42      | 517.36   | 0.60     | 118-124(12); 121-126(66);                                          |
| 18   | Singlet-A | 264 | 37745            | 0.088 | -42.4  | 0.58      | 253.40   | 0.37     | 121-125(14); 122-128(51); 123-130(6);                              |
| 19   | Singlet-A | 263 | 37914            | 0.013 | -12.7  | 0.61      | 179.61   | 0.27     | 118-124(27); 121-126(15); 122-129(17);<br>122-130(9); 123-131(17); |
| 20   | Singlet-A | 257 | 38843            | 0.188 | -22.8  | 0.61      | 231.00   | 0.40     | 118-124(7); 120-125(15); 122-129(62);                              |
| 21   | Singlet-A | 257 | 38857            | 0.009 | -88.2  | 0.50      | 483.60   | 0.57     | 121-127(58); 121-128(20);                                          |
| 23   | Singlet-A | 254 | 39363            | 0.043 | 31.1   | 0.57      | 278.13   | 0.34     | 119-125(10); 122-130(55); 123-131(20);                             |
| 24   | Singlet-A | 251 | 39695            | 0.002 | 19.2   | 0.61      | 67.98    | 0.26     | 119-125(12); 120-125(30); 121-129(23);<br>123-131(15);             |
| 25   | Singlet-A | 250 | 39866            | 0.020 | -41.7  | 0.47      | 346.31   | 0.47     | 120-126(33); 122-131(31); 122-132(15);                             |
| 26   | Singlet-A | 250 | 39879            | 0.047 | 108.3  | 0.56      | 258.35   | 0.40     | 119-125(60); 122-130(12);                                          |
| 27   | Singlet-A | 247 | 40440            | 0.028 | 21.9   | 0.39      | 191.86   | 0.64     | 123-132(75);                                                       |
| 28   | Singlet-A | 246 | 40622            | 0.015 | 25.6   | 0.57      | 366.64   | 0.40     | 120-126(10); 121-127(17); 121-128(10);<br>121-131(9); 122-131(35); |
| 29   | Singlet-A | 243 | 41098            | 0.005 | -39.9  | 0.55      | 454.45   | 0.41     | 117-124(9); 120-126(8); 121-127(7); 121-<br>128(37); 122-131(20);  |
| 30   | Singlet-A | 242 | 41239            | 0.018 | 18.4   | 0.55      | 27.43    | 0.43     | 117-124(70); 119-126(7);                                           |
| 34   | Singlet-A | 236 | 42336            | 0.006 | -49.4  | 0.54      | 118.47   | 0.28     | 116-124(7); 118-125(33); 121-128(17); 121-<br>131(23);             |
| 37   | Singlet-A | 233 | 42790            | 0.002 | -29.8  | 0.27      | 602.14   | 0.78     | 116-124(85);                                                       |
| 38   | Singlet-A | 233 | 42868            | 0.248 | 42.3   | 0.47      | 518.05   | 0.39     | 115-124(8); 118-126(21); 119-127(13); 120-<br>127(25); 121-130(6); |
| 39   | Singlet-A | 231 | 43236            | 0.160 | -0.5   | 0.57      | 400.45   | 0.40     | 115-124(8); 118-126(16); 119-127(53);                              |
| 40   | Singlet-A | 229 | 43638            | 0.097 | 59.5   | 0.50      | 44.38    | 0.43     | 115-124(54); 118-126(8); 121-129(6);                               |

Table. Converged cartesian atomic coordinates in Angstroms

| Atom | X       | Y       | Z       |
|------|---------|---------|---------|
| C    | -4.1226 | 2.7302  | -1.1722 |
| C    | -2.8415 | 2.7798  | -0.5842 |
| C    | -1.9833 | 1.6468  | -0.6821 |
| C    | -2.4112 | 0.5628  | -1.4746 |
| C    | -3.6479 | 0.5594  | -2.0676 |
| C    | -4.5278 | 1.6381  | -1.8923 |
| C    | -2.3839 | 3.9707  | 0.0361  |
| C    | -1.0976 | 4.0860  | 0.4693  |
| C    | -0.2571 | 2.9628  | 0.3817  |
| C    | -0.6925 | 1.7136  | -0.0593 |
| S    | 1.4412  | 3.0087  | 0.7301  |
| C    | 1.5912  | 1.3299  | 0.3229  |
| C    | 0.3528  | 0.7117  | 0.0600  |
| C    | 0.3528  | -0.7117 | -0.0596 |
| C    | 1.5912  | -1.3300 | -0.3226 |
| C    | 2.8097  | -0.6609 | -0.2056 |
| C    | 2.8097  | 0.6607  | 0.2057  |
| S    | 4.3601  | 1.4126  | 0.4619  |
| C    | 5.3494  | -0.0001 | -0.0002 |
| S    | 4.3600  | -1.4127 | -0.4620 |
| C    | -0.6926 | -1.7136 | 0.0596  |
| C    | -0.2573 | -2.9628 | -0.3815 |
| S    | 1.4411  | -3.0088 | -0.7297 |
| C    | -1.9835 | -1.6468 | 0.6821  |

|   |         |         |         |
|---|---------|---------|---------|
| C | -2.8417 | -2.7797 | 0.5841  |
| C | -2.3842 | -3.9706 | -0.0363 |
| C | -1.0977 | -4.0859 | -0.4692 |
| C | -2.4114 | -0.5628 | 1.4747  |
| C | -3.6482 | -0.5592 | 2.0674  |
| C | -4.5281 | -1.6379 | 1.8919  |
| C | -4.1229 | -2.7300 | 1.1718  |
| O | 6.5413  | -0.0000 | -0.0003 |
| H | -0.7212 | -5.0215 | -0.8668 |
| H | -3.0610 | -4.8160 | -0.1040 |
| H | -4.7742 | -3.5921 | 1.0664  |
| H | -5.5113 | -1.6173 | 2.3489  |
| H | -3.9447 | 0.2849  | 2.6804  |
| H | -1.7436 | 0.2711  | 1.6410  |
| H | -3.0606 | 4.8162  | 0.1036  |
| H | -0.7210 | 5.0215  | 0.8668  |
| H | -1.7435 | -0.2711 | -1.6408 |
| H | -3.9444 | -0.2847 | -2.6806 |
| H | -5.5109 | 1.6175  | -2.3493 |
| H | -4.7739 | 3.5924  | -1.0668 |

---

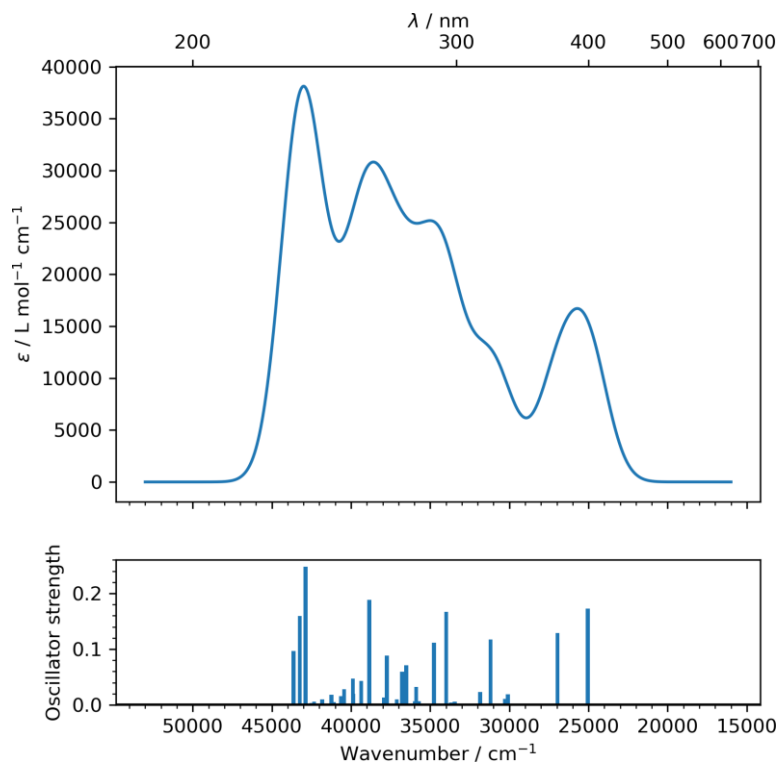

Figure 4: Calculated UV visible Absorption spectrum with a gaussian broadening (FWHM = 3000  $\text{cm}^{-1}$ )

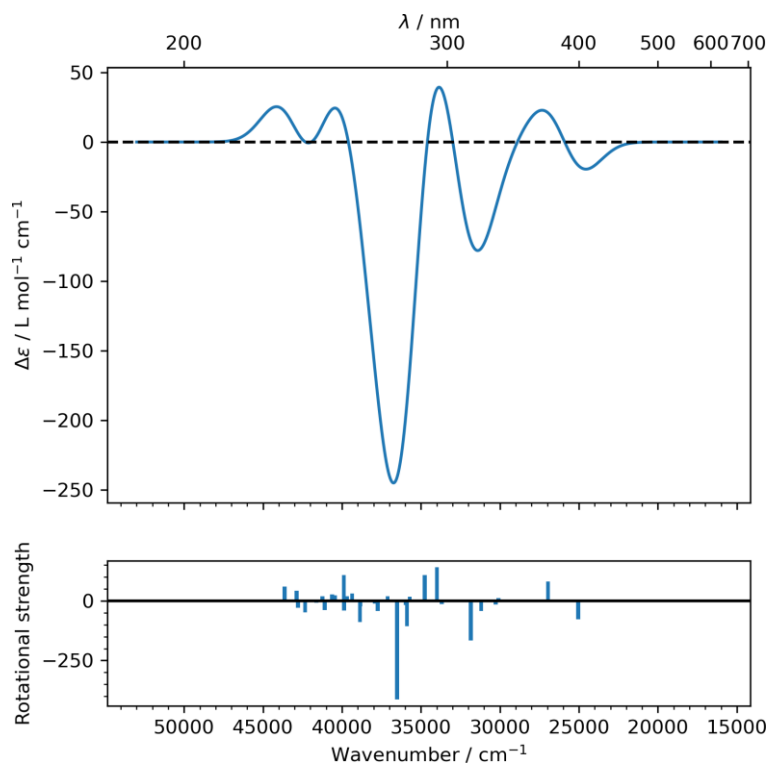

Figure 5: Calculated Circular Dichroism spectrum with a gaussian broadening (FWHM = 3000  $\text{cm}^{-1}$ )



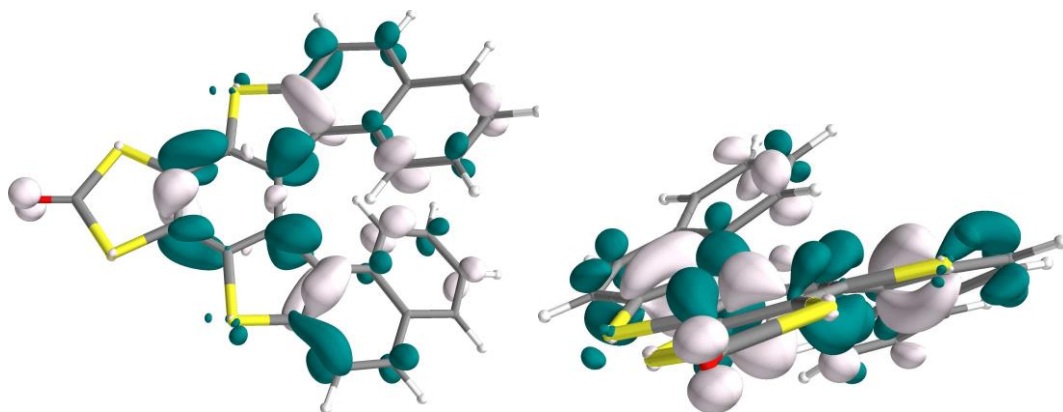

Figure 6: Representation of the Electron Density Difference (S1-S0) from two points of view.

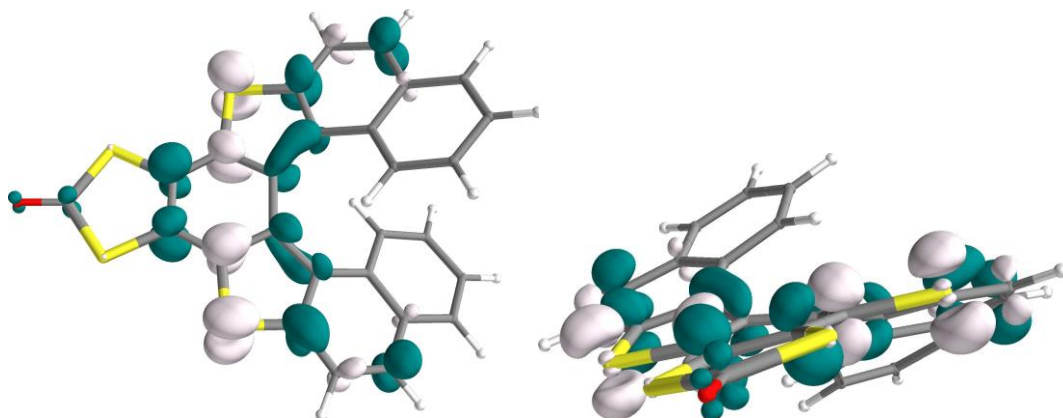

Figure 7: Representation of the Electron Density Difference (S2-S0) from two points of view.

# 1 Supplementary theoretical results generated by quchemreport

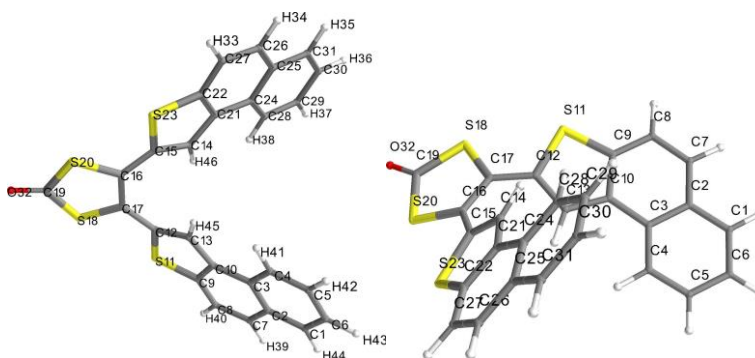

Figure 1: Chemical structure diagram with atomic numbering from two points of view.

|                                                    |                      |                         |
|----------------------------------------------------|----------------------|-------------------------|
| Compound name and Formula                          | 4_dicat              | C27H14OS4 <sup>++</sup> |
| Charge and Multiplicity                            | 2                    | 1                       |
| Software                                           | Gaussian             | (2009+D.01)             |
| Computational method                               | DFT                  |                         |
| Functional                                         | PBE1PBE              |                         |
| Basis set name                                     | 6-311+G(2d,p)        |                         |
| Solvent                                            | Gas                  |                         |
| Total molecular energy                             | -2703.22557 hartrees |                         |
| HOMO number                                        | 123                  |                         |
| LUMO+1 energies                                    | -9.25 eV             |                         |
| LUMO energies                                      | -10.67 eV            |                         |
| HOMO energies                                      | -12.34 eV            |                         |
| HOMO-1 energies                                    | -12.82 eV            |                         |
| Sum of electronic and zero-point energy            | -2702.89729 Hartrees |                         |
| Sum of electronic and thermal energies at 298.15 K | -2702.87224 Hartrees |                         |
| Enthalpy at 298.15 K                               | -2702.87129 Hartrees |                         |
| Gibbs free energy at 298.15 K                      | -2702.95471 Hartrees |                         |
| Entropy at 298.15 K                                | 0.00028 Hartrees     |                         |

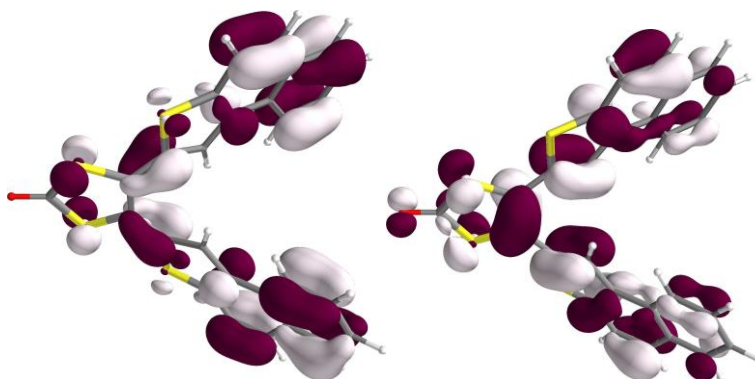

Figure 2: Representation of the Frontier Molecular Orbitals HOMO (left) and LUMO (right).

Table. Results concerning the calculated mono-electronic excitations.

| E.S. | Symmetry  | nm  | cm <sup>-1</sup> | f     | R      | Λ    | d <sub>CT</sub> | q <sub>CT</sub> | Excitation description : initial OM - ending OM (% if > 5%). a and b represent alpha or beta spinorbitals |
|------|-----------|-----|------------------|-------|--------|------|-----------------|-----------------|-----------------------------------------------------------------------------------------------------------|
| 1    | Singlet-A | 878 | 11380            | 0.000 | 9.4    | 0.66 | 200.96          | 0.54            | 121-124(65); 122-124(33);                                                                                 |
| 2    | Singlet-A | 845 | 11824            | 0.078 | -175.6 | 0.61 | 294.63          | 0.60            | 120-124(74); 123-124(25);                                                                                 |
| 3    | Singlet-A | 828 | 12070            | 0.295 | 751.4  | 0.74 | 309.60          | 0.52            | 120-124(24); 123-124(78);                                                                                 |
| 4    | Singlet-A | 688 | 14532            | 0.147 | -178.2 | 0.70 | 253.68          | 0.51            | 121-124(30); 122-124(60); 123-125(9);                                                                     |
| 5    | Singlet-A | 478 | 20914            | 0.161 | -297.2 | 0.68 | 230.22          | 0.47            | 118-124(33); 123-125(59);                                                                                 |
| 6    | Singlet-A | 471 | 21193            | 0.040 | -37.2  | 0.75 | 145.28          | 0.42            | 119-124(94);                                                                                              |
| 7    | Singlet-A | 459 | 21755            | 0.021 | -23.8  | 0.41 | 477.87          | 0.77            | 117-124(90);                                                                                              |
| 8    | Singlet-A | 439 | 22739            | 0.282 | -58.9  | 0.69 | 14.71           | 0.42            | 117-124(7); 118-124(58); 123-125(25);                                                                     |
| 9    | Singlet-A | 426 | 23423            | 0.015 | 10.9   | 0.63 | 286.06          | 0.64            | 122-125(97);                                                                                              |
| 10   | Singlet-A | 417 | 23931            | 0.012 | 61.5   | 0.62 | 195.75          | 0.59            | 116-124(23); 121-125(72);                                                                                 |
| 11   | Singlet-A | 411 | 24287            | 0.000 | -4.7   | 0.57 | 353.57          | 0.66            | 120-125(97);                                                                                              |
| 12   | Singlet-A | 405 | 24642            | 0.074 | -37.1  | 0.62 | 80.45           | 0.56            | 116-124(71); 121-125(21);                                                                                 |
| 13   | Singlet-A | 394 | 25343            | 0.021 | 16.4   | 0.55 | 40.71           | 0.65            | 115-124(95);                                                                                              |
| 14   | Singlet-A | 338 | 29558            | 0.093 | -68.0  | 0.70 | 116.77          | 0.48            | 114-124(93);                                                                                              |
| 15   | Singlet-A | 314 | 31829            | 0.040 | 6.3    | 0.68 | 10.03           | 0.53            | 118-125(94);                                                                                              |
| 16   | Singlet-A | 311 | 32054            | 0.067 | -0.8   | 0.71 | 247.79          | 0.40            | 113-124(36); 119-125(58);                                                                                 |
| 17   | Singlet-A | 308 | 32395            | 0.117 | 52.5   | 0.67 | 245.38          | 0.34            | 113-124(53); 119-125(33);                                                                                 |
| 18   | Singlet-A | 302 | 33009            | 0.007 | 9.3    | 0.36 | 372.60          | 0.77            | 117-125(87);                                                                                              |
| 19   | Singlet-A | 300 | 33239            | 0.000 | -0.2   | 0.33 | 389.23          | 0.78            | 112-124(92);                                                                                              |
| 20   | Singlet-A | 300 | 33308            | 0.000 | 0.7    | 0.34 | 372.98          | 0.78            | 111-124(86);                                                                                              |

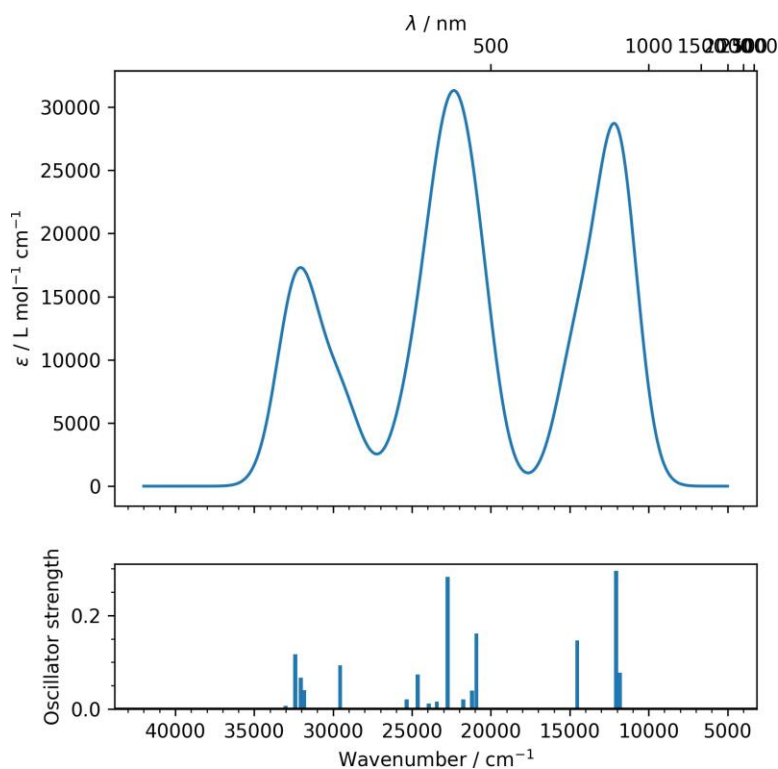

Figure 3: Calculated UV visible Absorption spectrum with a gaussian broadening (FWHM = 3000 cm-1)

Table. Converged cartesian atomic coordinates in Angstroms

| Atom | X       | Y       | Z       |
|------|---------|---------|---------|
| C    | -4.4614 | 3.7939  | -0.9549 |
| C    | -4.0778 | 2.5860  | -0.3409 |
| C    | -2.9124 | 1.9068  | -0.7900 |
| C    | -2.1750 | 2.4578  | -1.8346 |
| C    | -2.5759 | 3.6461  | -2.4267 |
| C    | -3.7172 | 4.3178  | -1.9881 |
| C    | -4.8516 | 2.0455  | 0.7118  |
| C    | -4.5390 | 0.8552  | 1.3436  |
| C    | -3.4111 | 0.1766  | 0.9148  |
| C    | -2.5676 | 0.6707  | -0.1275 |
| S    | -2.8682 | -1.3426 | 1.5321  |
| C    | -1.5028 | -1.3344 | 0.4467  |

|   |         |         |         |
|---|---------|---------|---------|
| C | -1.5058 | -0.1772 | -0.3686 |
| C | 1.5007  | -0.2207 | 0.3757  |
| C | 1.4591  | -1.3752 | -0.4428 |
| C | 0.6019  | -2.4704 | -0.3271 |
| C | -0.6764 | -2.4531 | 0.3316  |
| S | -1.2643 | -3.9811 | 0.8887  |
| C | -0.0739 | -4.9975 | -0.0019 |
| S | 1.1460  | -4.0130 | -0.8883 |
| C | 2.5856  | 0.5965  | 0.1305  |
| C | 3.4073  | 0.0812  | -0.9191 |
| S | 2.8171  | -1.4197 | -1.5367 |
| C | 2.9714  | 1.8202  | 0.7941  |
| C | 4.1522  | 2.4666  | 0.3369  |
| C | 4.9019  | 1.9075  | -0.7235 |
| C | 4.5506  | 0.7283  | -1.3554 |
| C | 2.2599  | 2.3890  | 1.8471  |
| C | 2.7008  | 3.5630  | 2.4395  |
| C | 3.8571  | 4.2026  | 1.9928  |
| C | 4.5762  | 3.6608  | 0.9510  |
| O | -0.0909 | -6.1729 | -0.0041 |
| H | 5.1652  | 0.3220  | -2.1496 |
| H | 5.8022  | 2.4238  | -1.0432 |
| H | 5.4788  | 4.1459  | 0.5949  |
| H | 4.1888  | 5.1183  | 2.4677  |
| H | 2.1401  | 3.9857  | 3.2657  |
| H | 1.3601  | 1.9157  | 2.2237  |
| H | -5.7396 | 2.5861  | 1.0259  |
| H | -5.1713 | 0.4648  | 2.1319  |
| H | -1.2860 | 1.9597  | -2.2047 |
| H | -1.9956 | 4.0552  | -3.2461 |
| H | -4.0175 | 5.2444  | -2.4626 |
| H | -5.3527 | 4.3039  | -0.6051 |
| H | -0.7840 | -0.0383 | -1.1617 |
| H | 0.7879  | -0.0628 | 1.1734  |

---

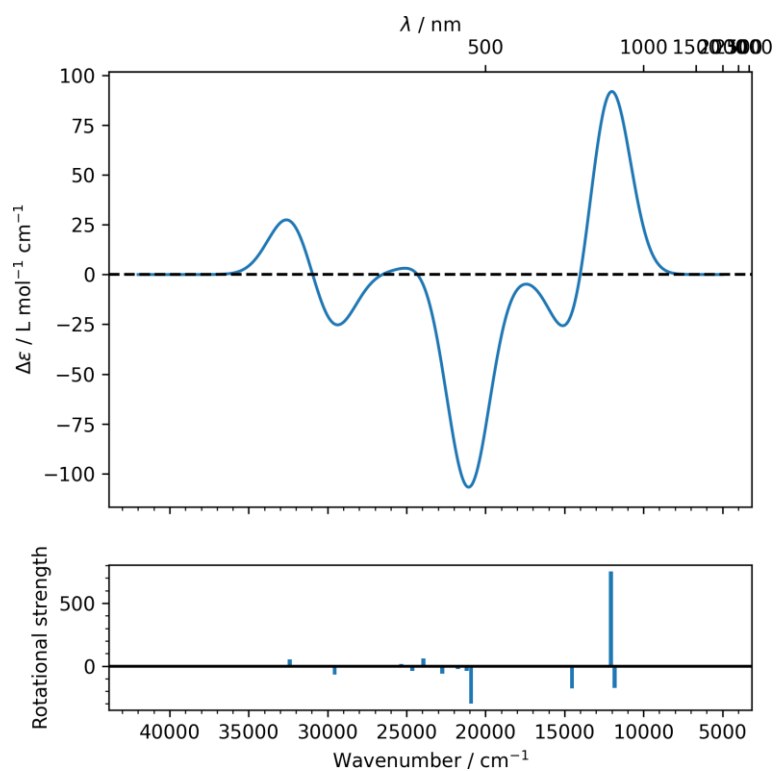

Figure 4: Calculated Circular Dichroism spectrum with a gaussian broadening (FWHM = 3000  $\text{cm}^{-1}$ )

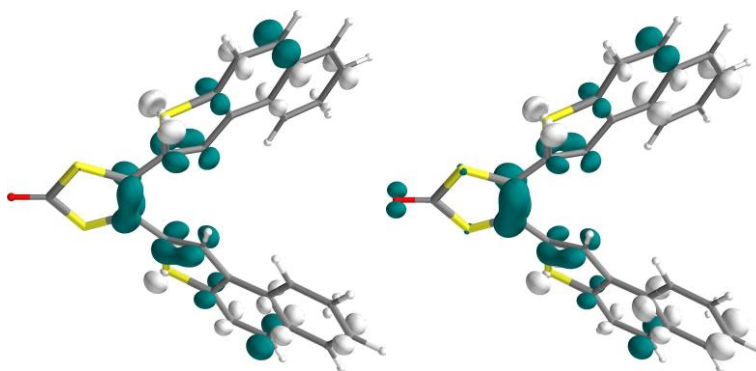

Figure 5: Representation of the Electron Density Difference (S1-S0 left) and (S2-S0 right). The excited electron and the hole regions are indicated by respectively blue and white surfaces.

# 1 Supplementary theoretical results generated by quchemreport

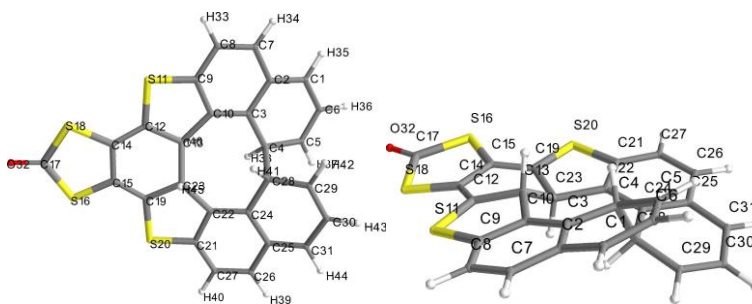

Figure 1: Chemical structure diagram with atomic numbering from two points of view.

|                                                    |                      |             |
|----------------------------------------------------|----------------------|-------------|
| Compound name and Formula                          | 4''_dicat            | C27H14OS4++ |
| Charge and Multiplicity                            | 2                    | 1           |
| Software                                           | Gaussian             | (2009+D.01) |
| Computational method                               | DFT                  |             |
| Functional                                         | PBE1PBE              |             |
| Basis set name                                     | 6-311+G(2d,p)        |             |
| Solvent                                            | Gas                  |             |
| Total molecular energy                             | -2703.17178 hartrees |             |
| HOMO number                                        | 123                  |             |
| LUMO+1 energies                                    | -9.81 eV             |             |
| LUMO energies                                      | -9.99 eV             |             |
| HOMO energies                                      | -11.65 eV            |             |
| HOMO-1 energies                                    | -12.60 eV            |             |
| Sum of electronic and zero-point energy            | -2702.84013 Hartrees |             |
| Sum of electronic and thermal energies at 298.15 K | -2702.81702 Hartrees |             |
| Enthalpy at 298.15 K                               | -2702.81607 Hartrees |             |
| Gibbs free energy at 298.15 K                      | -2702.89166 Hartrees |             |
| Entropy at 298.15 K                                | 0.00025 Hartrees     |             |

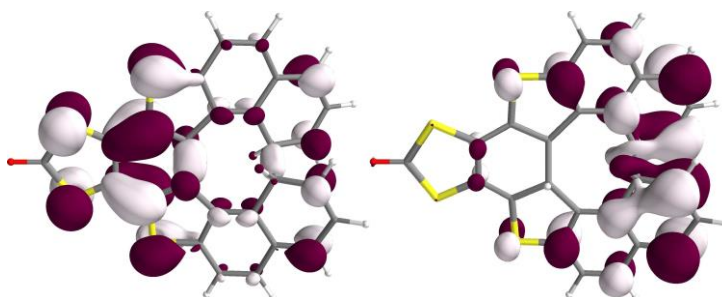

Figure 2: Representation of the Frontier Molecular Orbitals HOMO (left) and LUMO (right).

Table. Results concerning the calculated mono-electronic excitations.

| E.S. | Symmetry  | nm   | cm <sup>-1</sup> | f     | R      | Λ    | d <sub>CT</sub> | q <sub>CT</sub> | Excitation description : initial OM - ending OM (% if > 5%). a and b represent alpha or beta spinorbitals |
|------|-----------|------|------------------|-------|--------|------|-----------------|-----------------|-----------------------------------------------------------------------------------------------------------|
| 1    | Singlet-A | 1089 | 9181             | 0.027 | 218.5  | 0.62 | 513.61          | 0.70            | 123-124(100);                                                                                             |
| 2    | Singlet-A | 841  | 11882            | 0.094 | -40.6  | 0.73 | 529.16          | 0.58            | 122-124(11); 123-125(88);                                                                                 |
| 3    | Singlet-A | 547  | 18278            | 0.021 | 99.2   | 0.62 | 646.32          | 0.61            | 122-125(95);                                                                                              |
| 4    | Singlet-A | 546  | 18302            | 0.336 | -196.3 | 0.55 | 618.23          | 0.73            | 122-124(87); 123-125(11);                                                                                 |
| 5    | Singlet-A | 432  | 23118            | 0.005 | 159.1  | 0.62 | 523.98          | 0.54            | 120-124(64); 123-126(28);                                                                                 |
| 6    | Singlet-A | 420  | 23770            | 0.000 | -0.7   | 0.12 | 829.63          | 0.97            | 121-124(99);                                                                                              |
| 7    | Singlet-A | 415  | 24060            | 0.038 | -59.2  | 0.61 | 489.95          | 0.61            | 119-124(79); 120-125(17);                                                                                 |
| 8    | Singlet-A | 410  | 24351            | 0.011 | -22.7  | 0.66 | 467.37          | 0.43            | 119-125(37); 120-124(22); 123-126(31);                                                                    |
| 9    | Singlet-A | 402  | 24865            | 0.000 | -0.1   | 0.13 | 765.91          | 0.95            | 121-125(98);                                                                                              |
| 10   | Singlet-A | 388  | 25744            | 0.018 | 53.3   | 0.60 | 340.34          | 0.44            | 117-125(6); 118-124(35); 119-125(21); 120-124(10); 123-126(20);                                           |
| 11   | Singlet-A | 385  | 25915            | 0.146 | -169.2 | 0.61 | 528.99          | 0.55            | 118-125(10); 119-124(14); 120-125(70);                                                                    |
| 12   | Singlet-A | 377  | 26521            | 0.177 | 98.9   | 0.59 | 289.81          | 0.47            | 117-125(6); 118-124(41); 119-125(34); 123-126(13);                                                        |
| 13   | Singlet-A | 374  | 26700            | 0.016 | -11.2  | 0.52 | 150.62          | 0.69            | 117-124(60); 118-125(34);                                                                                 |
| 14   | Singlet-A | 347  | 28813            | 0.070 | -95.3  | 0.51 | 231.43          | 0.55            | 117-124(27); 118-125(45); 123-127(16);                                                                    |
| 15   | Singlet-A | 346  | 28860            | 0.013 | 14.0   | 0.47 | 448.46          | 0.59            | 117-124(9); 118-125(9); 123-127(76);                                                                      |
| 16   | Singlet-A | 343  | 29076            | 0.002 | -6.2   | 0.48 | 82.97           | 0.74            | 117-125(84); 118-124(14);                                                                                 |
| 17   | Singlet-A | 338  | 29569            | 0.000 | -1.3   | 0.57 | 76.74           | 0.63            | 123-129(64); 123-131(27);                                                                                 |
| 18   | Singlet-A | 331  | 30122            | 0.021 | -24.7  | 0.61 | 178.22          | 0.58            | 123-128(92);                                                                                              |
| 19   | Singlet-A | 315  | 31662            | 0.004 | -5.5   | 0.56 | 3.40            | 0.61            | 123-129(24); 123-131(62);                                                                                 |
| 20   | Singlet-A | 315  | 31695            | 0.024 | -15.5  | 0.55 | 506.87          | 0.53            | 116-124(52); 123-130(42);                                                                                 |

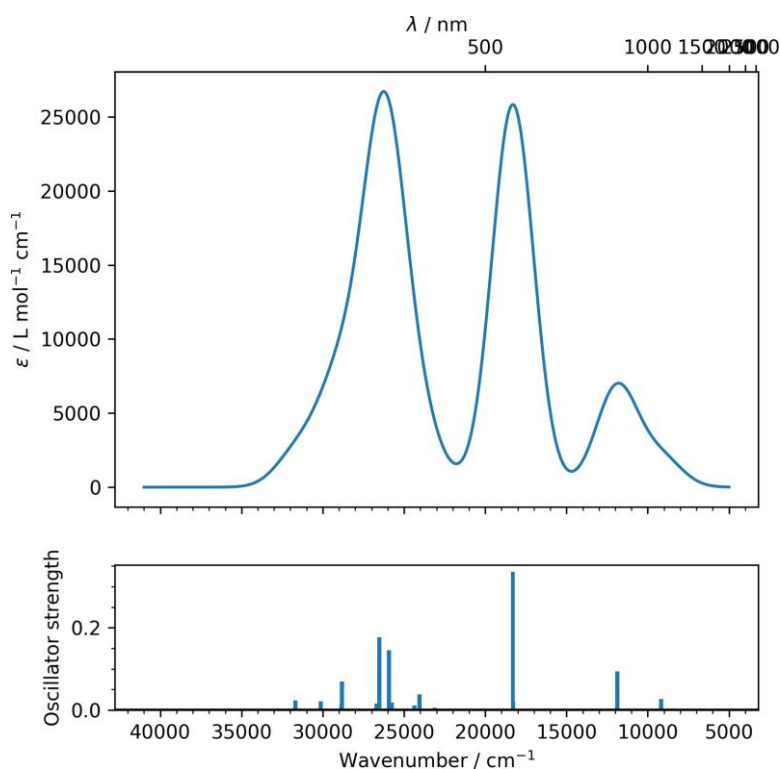

Figure 3: Calculated UV visible Absorption spectrum with a gaussian broadening (FWHM = 3000 cm-1)

Table. Converged cartesian atomic coordinates in Angstroms

| Atom | X      | Y       | Z       |
|------|--------|---------|---------|
| C    | 4.1380 | -2.9321 | 0.7479  |
| C    | 2.8177 | -2.9545 | 0.3167  |
| C    | 2.0433 | -1.7512 | 0.3420  |
| C    | 2.7291 | -0.4598 | 0.6478  |
| C    | 4.1166 | -0.5815 | 1.1815  |
| C    | 4.7716 | -1.7615 | 1.2283  |
| C    | 2.2171 | -4.1835 | -0.0612 |
| C    | 0.8864 | -4.2379 | -0.3419 |
| C    | 0.1345 | -3.0574 | -0.2311 |
| C    | 0.6942 | -1.7924 | 0.0827  |

|   |         |         |         |
|---|---------|---------|---------|
| S | -1.5594 | -3.0574 | -0.4097 |
| C | -1.6816 | -1.3656 | -0.0882 |
| C | -0.3630 | -0.7098 | 0.3201  |
| C | -2.8614 | -0.7105 | -0.1327 |
| C | -2.8614 | 0.7105  | 0.1326  |
| S | -4.4039 | 1.4440  | 0.4369  |
| C | -5.3939 | 0.0000  | -0.0002 |
| S | -4.4039 | -1.4440 | -0.4370 |
| C | -1.6816 | 1.3657  | 0.0882  |
| S | -1.5594 | 3.0574  | 0.4099  |
| C | 0.1345  | 3.0574  | 0.2314  |
| C | 0.6941  | 1.7925  | -0.0827 |
| C | -0.3630 | 0.7098  | -0.3200 |
| C | 2.0432  | 1.7513  | -0.3421 |
| C | 2.8178  | 2.9545  | -0.3166 |
| C | 2.2171  | 4.1834  | 0.0615  |
| C | 0.8865  | 4.2379  | 0.3423  |
| C | 2.7288  | 0.4599  | -0.6484 |
| C | 4.1162  | 0.5816  | -1.1823 |
| C | 4.7715  | 1.7614  | -1.2284 |
| C | 4.1381  | 2.9320  | -0.7476 |
| O | -6.5706 | 0.0000  | -0.0001 |
| H | 0.4050  | -5.1716 | -0.6089 |
| H | 2.8246  | -5.0815 | -0.0945 |
| H | 4.6946  | -3.8651 | 0.7482  |
| H | 5.7807  | -1.8224 | 1.6189  |
| H | 4.5885  | 0.3244  | 1.5477  |
| H | 2.1382  | 0.0722  | 1.4076  |
| H | 2.8246  | 5.0815  | 0.0948  |
| H | 0.4052  | 5.1715  | 0.6095  |
| H | 2.1376  | -0.0720 | -1.4079 |
| H | 4.5878  | -0.3243 | -1.5491 |
| H | 5.7806  | 1.8223  | -1.6189 |
| H | 4.6949  | 3.8649  | -0.7476 |
| H | -0.4062 | 0.5616  | -1.4150 |
| H | -0.4064 | -0.5619 | 1.4151  |

---



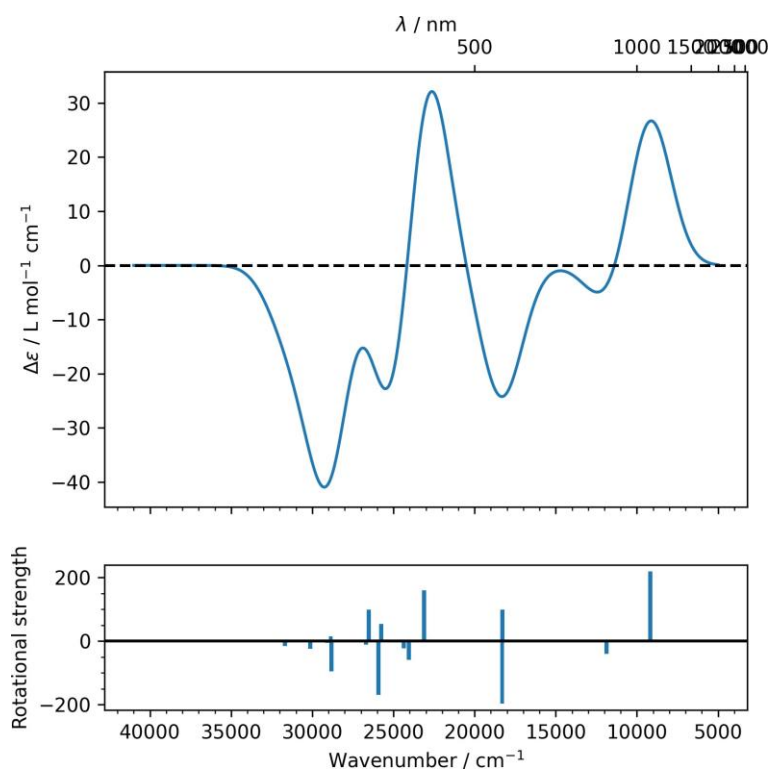

Figure 4: Calculated Circular Dichroism spectrum with a gaussian broadening (FWHM = 3000  $\text{cm}^{-1}$ )

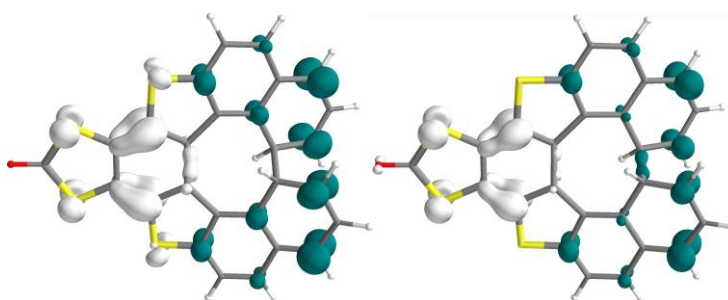

Figure 5: Representation of the Electron Density Difference (S1-S0 left) and (S2-S0 right). The excited electron and the hole regions are indicated by respectively blue and white surfaces.

# Molecular Calculation Report generated by quchemreport

March 30, 2022

## 1 MOLECULE

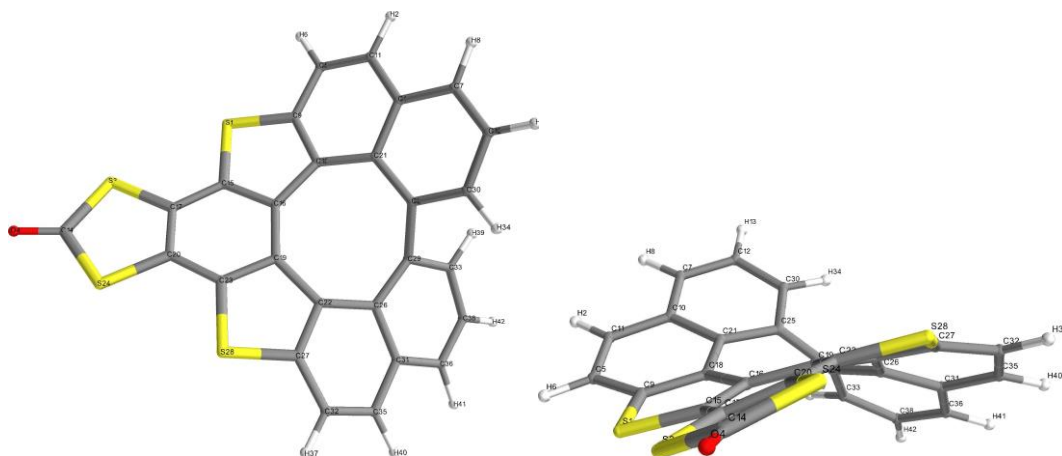

Figure 1: Chemical structure diagram with atomic numbering from two points of view.

Directory name 1-dTQC-M  
Formula C<sub>27</sub>H<sub>10</sub>O<sub>5</sub>  
Charge 0  
Spin multiplicity 1

## 2 COMPUTATIONAL DETAILS

|                                                         |               |             |
|---------------------------------------------------------|---------------|-------------|
| Software                                                | Gaussian      | (2009+D.01) |
| Computational method                                    | DFT           |             |
| Functional                                              | PBE1PBE       |             |
| Basis set name                                          | 6-311+G(2d,p) |             |
| Number of basis set functions                           | 956           |             |
| Closed shell calculation                                | True          |             |
| Requested SCF convergence on RMS and Max density matrix | 1e-08         | 1e-06       |
| Requested SCF convergence on energy                     | 1e-06         |             |
| Job type: Geometry optimization                         |               |             |
| Max Force value and threshold                           | 0.000036      | 0.000450    |
| RMS Force value and threshold                           | 0.000004      | 0.000300    |
| Max Displacement value and threshold                    | 0.000215      | 0.001800    |
| RMS Displacement value and threshold                    | 0.000051      | 0.001200    |
| Job type: Frequency and thermochemical analysis         |               |             |
| Temperature                                             | 298.15 K      |             |
| Anharmonic effects                                      | None          |             |
| Anharmonic effects                                      | None          |             |

## 3 RESULTS

|                                        |                      |
|----------------------------------------|----------------------|
| Total molecular energy                 | -2701.44291 hartrees |
| HOMO number                            | 122                  |
| LUMO+1 energies                        | -1.64 eV             |
| LUMO energies                          | -2.13 eV             |
| HOMO energies                          | -5.99 eV             |
| HOMO-1 energies                        | -6.31 eV             |
| Geometry optimization specific results |                      |
| Converged nuclear repulsion energy     | 3696.05192 Hartrees  |

Frequency and Thermochemistry specific results

Enthalpy at 298.15 K

Gibbs free energy at 298.15 K

Entropy at 298.15 K

-2701.13375 Hartrees

-2701.20720 Hartrees

0.00025 Hartrees

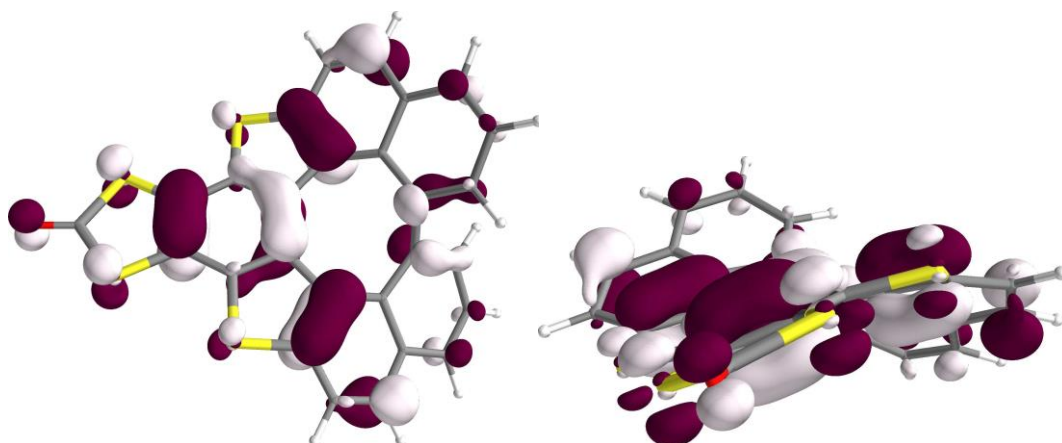

Figure 2: Representation of the HOMO from two points of view.

Table. Most intense (> 50 km/mol) molecular vibrations in wavenumbers

| Frequencies | Intensity | Symmetry |
|-------------|-----------|----------|
| 1795        | 918       | A        |
| 1366        | 72        | A        |
| 846         | 51        | A        |

Table. Converged cartesian atomic coordinates in Angstroms

| Atom | X       | Y       | Z       |
|------|---------|---------|---------|
| S    | 1.4554  | -2.9145 | -0.9829 |
| H    | -2.5211 | -5.1501 | 0.5467  |
| S    | 4.2899  | -1.3445 | -0.6349 |
| O    | 6.4712  | -0.0000 | 0.0001  |
| C    | -0.8725 | -4.2072 | -0.4075 |
| H    | -0.3959 | -5.1261 | -0.7288 |
| C    | -3.8157 | -3.0541 | 1.4758  |
| H    | -4.1765 | -4.0246 | 1.8007  |
| C    | -0.2193 | -2.9731 | -0.5757 |
| C    | -2.6454 | -2.9998 | 0.6962  |
| C    | -2.0365 | -4.2148 | 0.2880  |
| C    | -4.4790 | -1.9069 | 1.8118  |
| H    | -5.3590 | -1.9330 | 2.4445  |
| C    | 5.2794  | 0.0000  | 0.0000  |
| C    | 1.5185  | -1.2560 | -0.5067 |
| C    | 0.2602  | -0.6886 | -0.2048 |
| C    | 2.7421  | -0.6222 | -0.2923 |
| C    | -0.7617 | -1.7342 | -0.2300 |
| C    | 0.2602  | 0.6886  | 0.2047  |
| C    | 2.7421  | 0.6223  | 0.2923  |
| C    | -2.1008 | -1.7418 | 0.2896  |
| C    | -0.7618 | 1.7342  | 0.2300  |
| C    | 1.5185  | 1.2560  | 0.5066  |
| S    | 4.2899  | 1.3445  | 0.6348  |
| C    | -2.9409 | -0.6111 | 0.4275  |
| C    | -2.1008 | 1.7418  | -0.2896 |
| C    | -0.2193 | 2.9731  | 0.5757  |
| S    | 1.4554  | 2.9145  | 0.9829  |
| C    | -2.9410 | 0.6111  | -0.4275 |
| C    | -4.0676 | -0.7054 | 1.2297  |
| C    | -2.6454 | 2.9998  | -0.6962 |
| C    | -0.8726 | 4.2072  | 0.4075  |
| C    | -4.0677 | 0.7053  | -1.2297 |
| H    | -4.6832 | 0.1791  | 1.3511  |
| C    | -2.0366 | 4.2148  | -0.2880 |
| C    | -3.8157 | 3.0540  | -1.4758 |
| H    | -0.3960 | 5.1261  | 0.7288  |
| C    | -4.4791 | 1.9069  | -1.8118 |
| H    | -4.6832 | -0.1791 | -1.3510 |
| H    | -2.5212 | 5.1501  | -0.5467 |
| H    | -4.1765 | 4.0246  | -1.8006 |
| H    | -5.3590 | 1.9329  | -2.4445 |

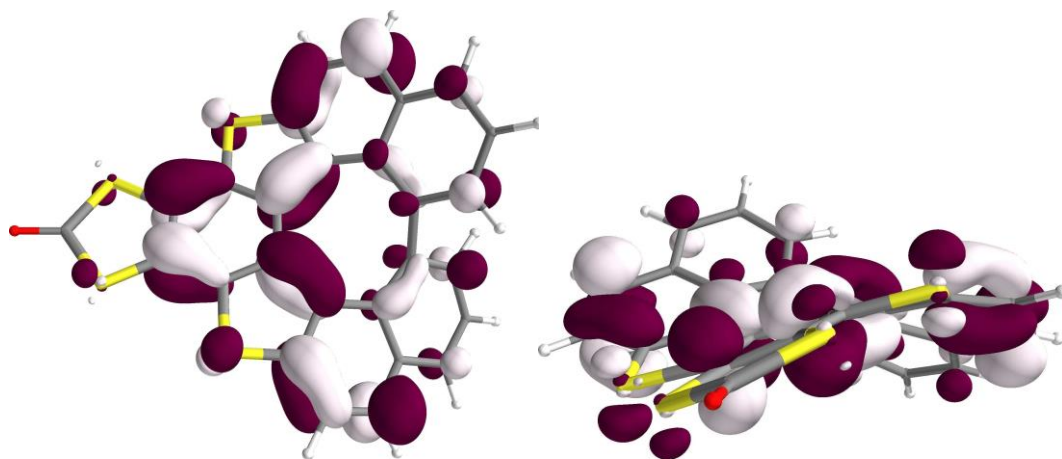

Figure 3: Representation of the LUMO from two points of view.

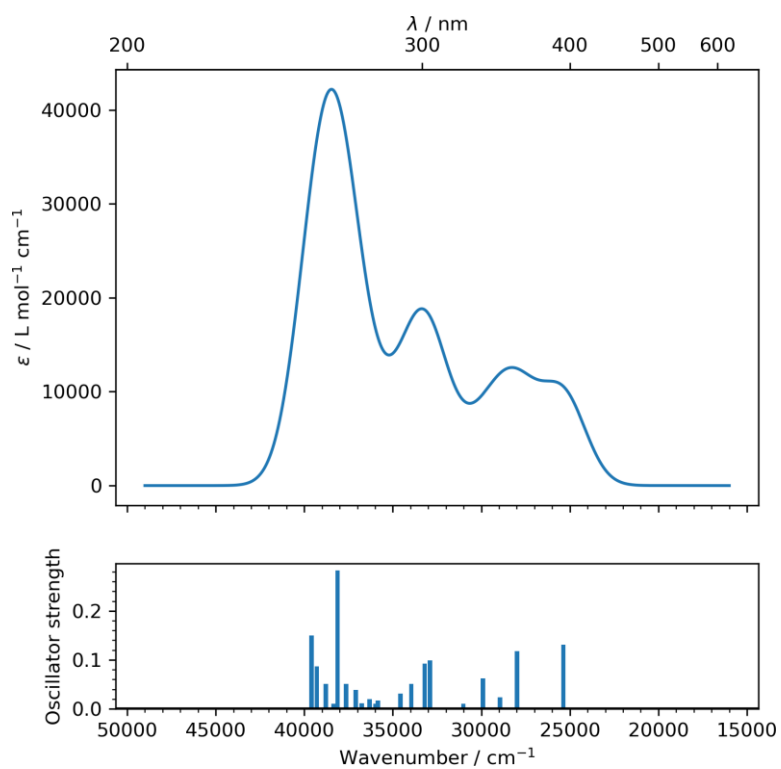

Figure 4: Calculated UV visible Absorption spectrum with a gaussian broadening (FWHM = 3000 cm-1)

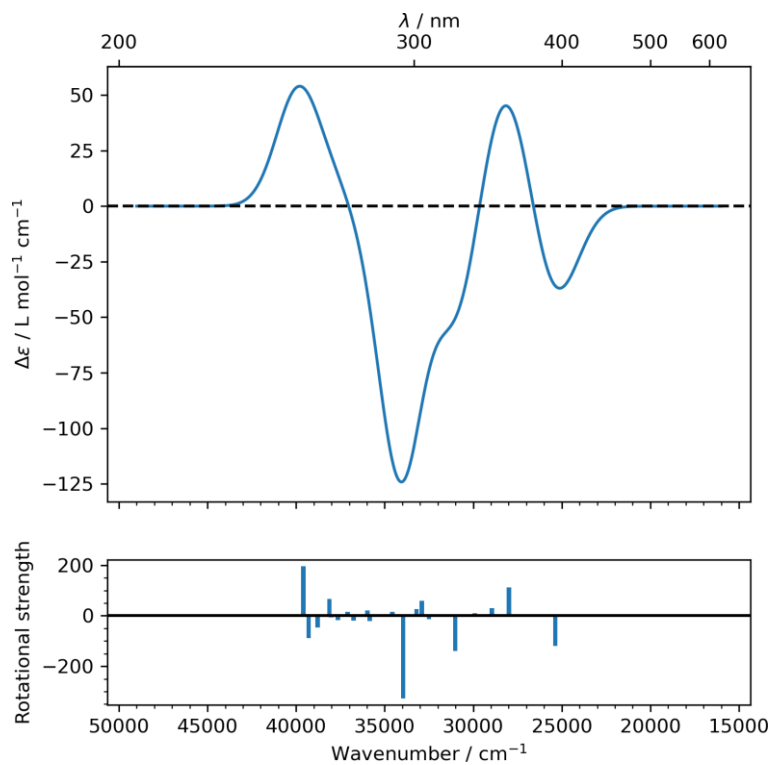

Figure 5: Calculated Circular Dichroism spectrum with a gaussian broadening (FWHM = 3000  $\text{cm}^{-1}$ )

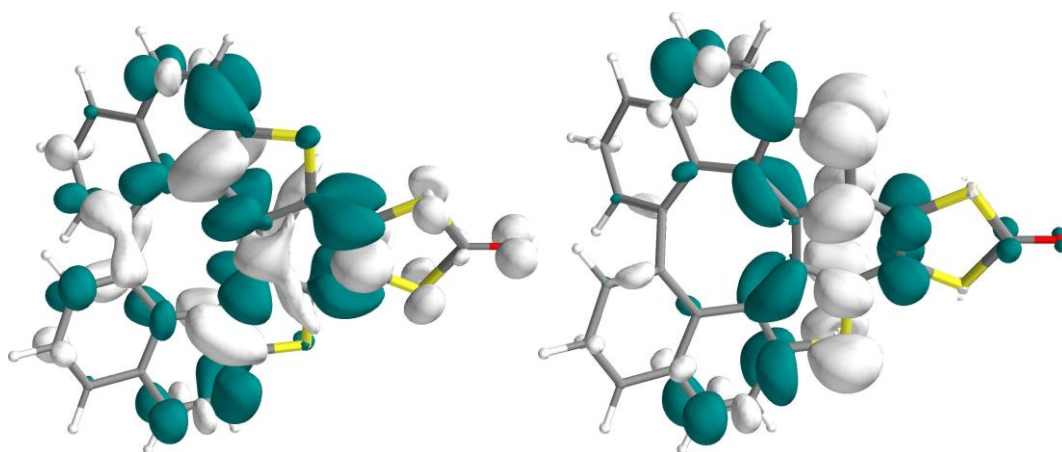

Figure 6: Representation of the Electron Density Difference (S1-S0 left) and (S2-S0 right). The excited electron and the hole regions are indicated by respectively blue and white surfaces.

# Molecular Calculation Report generated by quchemreport

February 9, 2022

## 1 MOLECULE

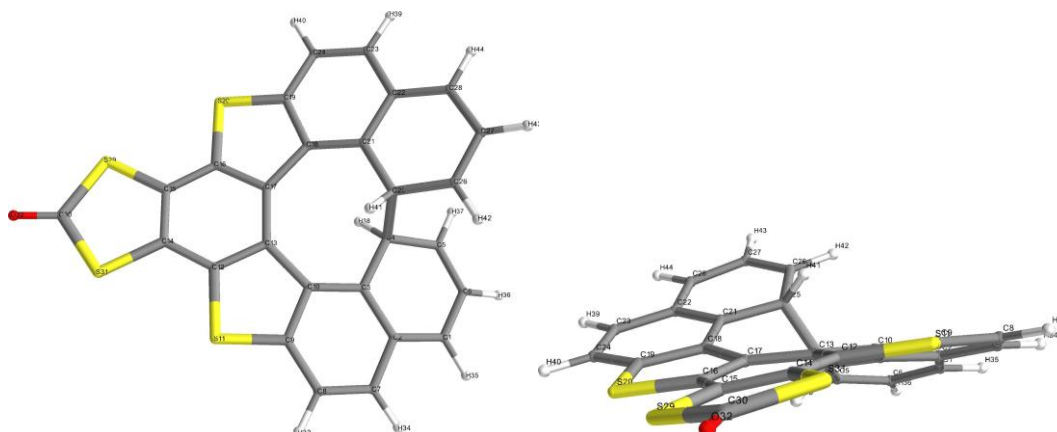

Figure 1: Chemical structure diagram with atomic numbering from two points of view.

Directory name 1-dTH'-dicat-M  
Formula C<sub>27</sub>H<sub>12</sub>OS<sub>4</sub>++  
Charge 2  
Spin multiplicity 1

## 2 COMPUTATIONAL DETAILS

|                                                         |               |               |
|---------------------------------------------------------|---------------|---------------|
| Software                                                | Gaussian      | (2009+D.01)   |
| Computational method                                    | DFT           |               |
| Functional                                              | PBE1PBE       |               |
| Basis set name                                          | 6-311+G(2d,p) |               |
| Number of basis set functions                           | 968           |               |
| Closed shell calculation                                | True          |               |
| Requested SCF convergence on RMS and Max density matrix | 1e-08         | 1e-06         |
| Requested SCF convergence on energy                     | 1e-06         |               |
| Job type: Geometry optimization                         |               |               |
| Max Force value and threshold                           | 0.000016      | 0.000450      |
| RMS Force value and threshold                           | 0.000002      | 0.000300      |
| Max Displacement value and threshold                    | 0.000768      | 0.001800      |
| RMS Displacement value and threshold                    | 0.000170      | 0.001200      |
| Job type: Frequency and thermochemical analysis         |               |               |
| Temperature                                             | 298.15 K      |               |
| Anharmonic effects                                      | None          |               |
| Anharmonic effects                                      | None          |               |
| Job type: Time-dependent calculation                    |               |               |
| Number of calculated excited states and spin state      | 40            | ['Singlet-A'] |

## 3 RESULTS

|                        |                      |
|------------------------|----------------------|
| Total molecular energy | -2702.02257 hartrees |
| HOMO number            | 122                  |
| LUMO+1 energies        | -9.90 eV             |
| LUMO energies          | -10.18 eV            |
| HOMO energies          | -12.23 eV            |
| HOMO-1 energies        | -12.56 eV            |

Geometry optimization specific results

Converged nuclear repulsion energy

3763.11718 Hartrees

Frequency and Thermochemistry specific results

Enthalpy at 298.15 K

-2701.68948 Hartrees

Gibbs free energy at 298.15 K

-2701.76405 Hartrees

Entropy at 298.15 K

0.00025 Hartrees

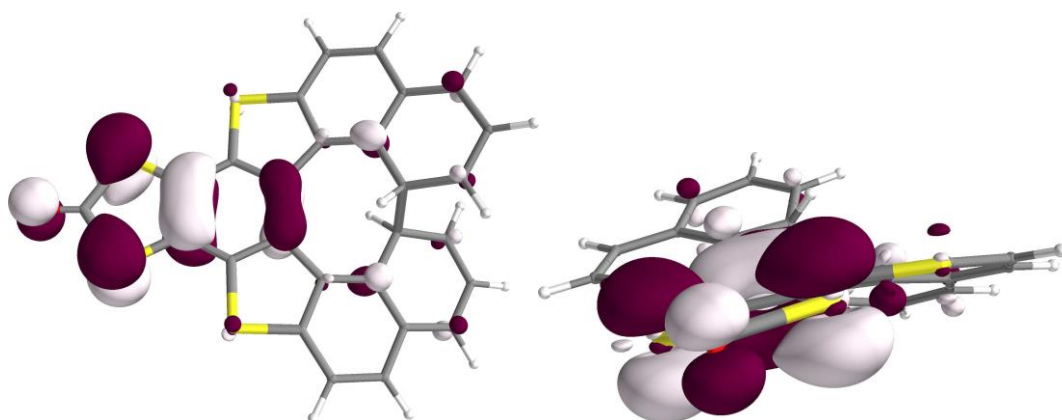

Figure 2: Representation of the HOMO from two points of view.

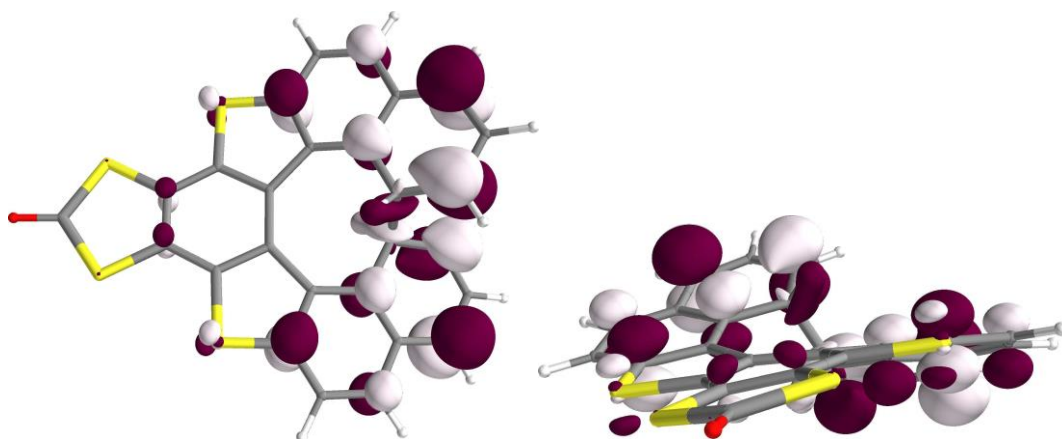

Figure 3: Representation of the LUMO from two points of view.

Table. Most intense (> 50 km/mol) molecular vibrations in wavenumbers

| Frequencies | Intensity | Symmetry |
|-------------|-----------|----------|
| 1869        | 901       | A        |
| 1670        | 78        | A        |
| 1668        | 77        | A        |
| 1615        | 167       | A        |
| 1584        | 91        | A        |
| 1580        | 87        | A        |
| 1526        | 130       | A        |
| 1517        | 133       | A        |
| 1502        | 176       | A        |
| 1466        | 68        | A        |
| 1378        | 80        | A        |
| 1355        | 62        | A        |
| 1283        | 88        | A        |
| 1210        | 311       | A        |
| 1161        | 52        | A        |
| 859         | 65        | A        |

Table. First five calculated mono-electronic excitations and those with  $f > 0.1$  or  $R > 10$ .

| E.S. | Symmetry  | nm  | cm <sup>-1</sup> | $f$   | R      | $\Lambda$ | $d_{CT}$ | $q_{CT}$ | Excitation description : initial OM - ending OM (% if > 5%)     |
|------|-----------|-----|------------------|-------|--------|-----------|----------|----------|-----------------------------------------------------------------|
| 1    | Singlet-A | 771 | 12957            | 0.076 | 49.0   | 0.56      | 647.45   | 0.72     | 122-123(91);                                                    |
| 2    | Singlet-A | 732 | 13659            | 0.006 | -17.4  | 0.52      | 593.39   | 0.69     | 121-123(51); 122-124(46);                                       |
| 3    | Singlet-A | 688 | 14515            | 0.023 | -153.9 | 0.52      | 603.73   | 0.70     | 121-123(47); 122-124(52);                                       |
| 4    | Singlet-A | 600 | 16646            | 0.069 | 42.2   | 0.53      | 503.42   | 0.70     | 121-124(90);                                                    |
| 5    | Singlet-A | 464 | 21518            | 0.046 | 74.9   | 0.54      | 500.18   | 0.63     | 117-123(8); 118-123(64); 120-123(22);                           |
| 6    | Singlet-A | 459 | 21781            | 0.009 | -132.0 | 0.57      | 507.58   | 0.66     | 119-123(94);                                                    |
| 7    | Singlet-A | 454 | 21990            | 0.006 | 14.6   | 0.26      | 785.39   | 0.81     | 118-123(19); 120-123(77);                                       |
| 8    | Singlet-A | 423 | 23619            | 0.015 | -202.0 | 0.61      | 416.41   | 0.56     | 118-124(81); 120-124(7);                                        |
| 11   | Singlet-A | 394 | 25333            | 0.005 | -27.2  | 0.47      | 405.24   | 0.67     | 117-124(88);                                                    |
| 12   | Singlet-A | 389 | 25653            | 0.195 | 238.5  | 0.57      | 535.12   | 0.58     | 117-123(14); 118-123(8); 119-124(67); 121-125(6);               |
| 14   | Singlet-A | 345 | 28924            | 0.195 | -3.6   | 0.60      | 523.90   | 0.44     | 115-123(8); 116-123(46); 122-125(35);                           |
| 15   | Singlet-A | 332 | 30054            | 0.203 | 173.4  | 0.65      | 291.34   | 0.43     | 116-124(9); 121-125(71); 122-127(6);                            |
| 16   | Singlet-A | 328 | 30455            | 0.065 | 56.8   | 0.52      | 421.54   | 0.62     | 116-124(81); 121-125(7);                                        |
| 17   | Singlet-A | 317 | 31447            | 0.022 | -43.5  | 0.62      | 316.40   | 0.56     | 115-123(87); 116-123(6);                                        |
| 19   | Singlet-A | 297 | 33668            | 0.086 | 91.3   | 0.62      | 374.79   | 0.56     | 115-124(85);                                                    |
| 20   | Singlet-A | 295 | 33830            | 0.015 | 23.1   | 0.66      | 246.52   | 0.50     | 114-123(85); 122-127(8);                                        |
| 22   | Singlet-A | 287 | 34832            | 0.200 | 67.6   | 0.57      | 461.30   | 0.54     | 121-126(8); 122-127(64); 122-128(9);                            |
| 23   | Singlet-A | 280 | 35702            | 0.007 | -51.3  | 0.66      | 258.79   | 0.42     | 114-124(55); 121-127(31);                                       |
| 26   | Singlet-A | 273 | 36601            | 0.031 | -27.8  | 0.45      | 496.77   | 0.56     | 113-123(13); 121-129(15); 122-128(53);                          |
| 29   | Singlet-A | 270 | 37027            | 0.002 | -20.1  | 0.65      | 171.80   | 0.37     | 114-124(28); 118-125(28); 121-127(24);                          |
| 30   | Singlet-A | 267 | 37412            | 0.002 | -18.9  | 0.64      | 85.13    | 0.38     | 111-123(6); 118-125(46); 121-127(29); 121-128(9);               |
| 31   | Singlet-A | 263 | 38019            | 0.164 | -89.9  | 0.53      | 338.37   | 0.38     | 113-123(13); 119-125(18); 121-126(18); 121-129(19); 122-127(7); |
| 33   | Singlet-A | 258 | 38615            | 0.026 | -43.5  | 0.60      | 344.11   | 0.38     | 111-123(8); 117-125(28); 118-125(12); 121-128(37);              |
| 36   | Singlet-A | 254 | 39313            | 0.007 | -14.8  | 0.56      | 385.49   | 0.53     | 111-123(20); 113-124(57);                                       |
| 37   | Singlet-A | 252 | 39585            | 0.218 | -2.9   | 0.58      | 276.23   | 0.57     | 122-130(85);                                                    |
| 38   | Singlet-A | 247 | 40344            | 0.118 | 13.5   | 0.63      | 289.88   | 0.36     | 111-123(25); 117-125(35); 118-126(7); 121-128(9);               |
| 40   | Singlet-A | 242 | 41183            | 0.003 | 37.1   | 0.35      | 414.56   | 0.75     | 120-127(41); 120-130(10); 120-131(41);                          |

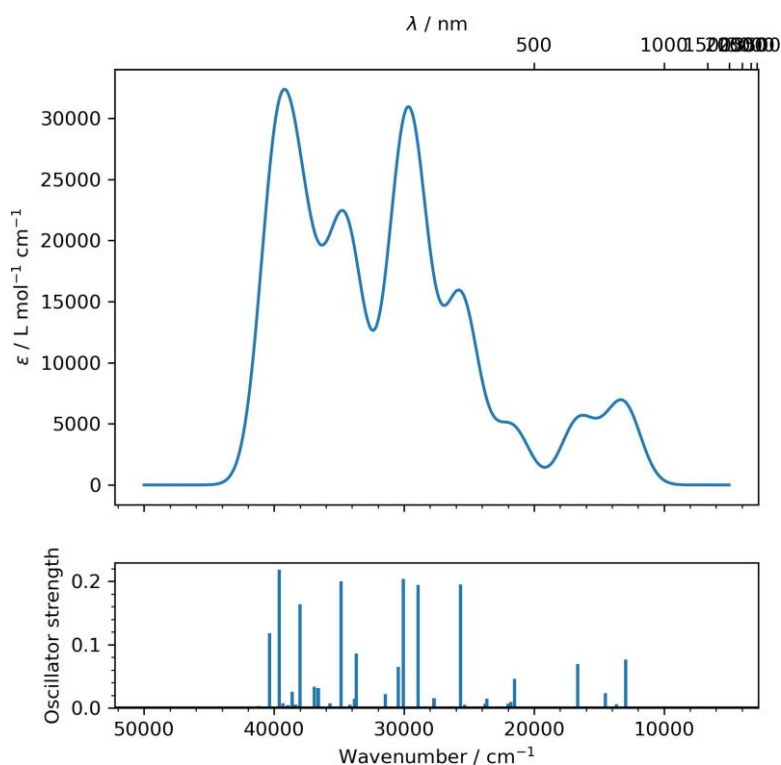

Figure 4: Calculated UV visible Absorption spectrum with a gaussian broadening (FWHM = 3000 cm<sup>-1</sup>)

Table. Converged cartesian atomic coordinates in Angstroms

| Atom | X | Y | Z |
|------|---|---|---|
|------|---|---|---|



---

|   |         |         |         |
|---|---------|---------|---------|
| C | -4.0662 | 2.9190  | -0.9279 |
| C | -2.7718 | 2.9539  | -0.4236 |
| C | -2.0204 | 1.7437  | -0.3488 |
| C | -2.6868 | 0.4645  | -0.6660 |
| C | -4.0418 | 0.5551  | -1.2530 |
| C | -4.6903 | 1.7328  | -1.3817 |
| C | -2.1913 | 4.1973  | -0.0509 |
| C | -0.8845 | 4.2478  | 0.3198  |
| C | -0.1392 | 3.0573  | 0.3100  |
| C | -0.6852 | 1.7678  | 0.0335  |
| S | 1.5387  | 3.0362  | 0.5554  |
| C | 1.6000  | 1.3240  | 0.2691  |
| C | 0.3356  | 0.7130  | 0.0863  |
| C | 2.8262  | 0.6759  | 0.1670  |
| C | 2.8262  | -0.6759 | -0.1671 |
| C | 1.5999  | -1.3240 | -0.2690 |
| C | 0.3356  | -0.7130 | -0.0862 |
| C | -0.6853 | -1.7678 | -0.0332 |
| C | -0.1392 | -3.0573 | -0.3095 |
| S | 1.5387  | -3.0362 | -0.5550 |
| C | -2.0206 | -1.7437 | 0.3487  |
| C | -2.7719 | -2.9539 | 0.4238  |
| C | -2.1913 | -4.1974 | 0.0515  |
| C | -0.8845 | -4.2479 | -0.3191 |
| C | -2.6870 | -0.4644 | 0.6656  |
| C | -4.0423 | -0.5550 | 1.2521  |
| C | -4.6907 | -1.7327 | 1.3810  |
| C | -4.0664 | -2.9190 | 0.9278  |
| S | 4.3572  | -1.4535 | -0.3722 |
| C | 5.3591  | -0.0000 | -0.0002 |
| S | 4.3573  | 1.4534  | 0.3719  |
| O | 6.5365  | -0.0000 | -0.0002 |
| H | -0.4078 | 5.1866  | 0.5773  |
| H | -2.7904 | 5.0998  | -0.0998 |
| H | -4.6158 | 3.8543  | -0.9946 |
| H | -5.6812 | 1.7818  | -1.8177 |
| H | -4.5059 | -0.3687 | -1.5851 |
| H | -2.0567 | -0.0788 | -1.3811 |
| H | -2.7903 | -5.0999 | 0.1006  |
| H | -0.4077 | -5.1867 | -0.5763 |
| H | -2.0573 | 0.0788  | 1.3810  |
| H | -4.5066 | 0.3689  | 1.5837  |
| H | -5.6818 | -1.7815 | 1.8167  |
| H | -4.6159 | -3.8543 | 0.9946  |

---

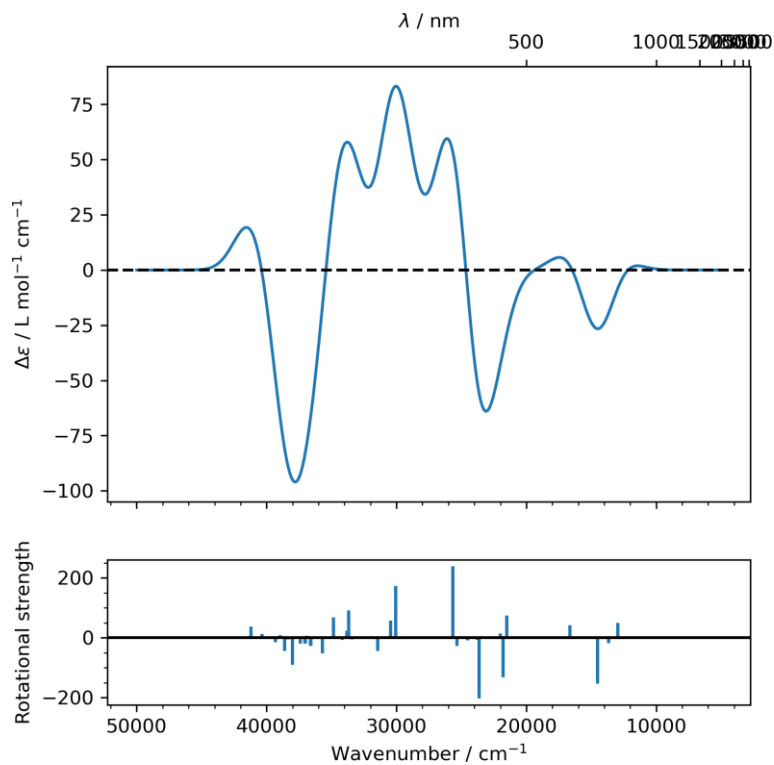

Figure 5: Calculated Circular Dichroism spectrum with a gaussian broadening (FWHM = 3000 cm<sup>-1</sup>)

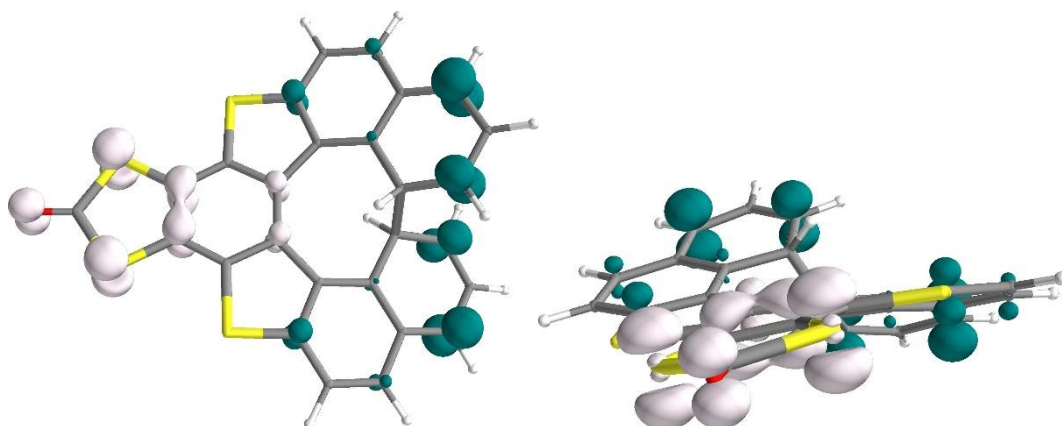

Figure 6: Representation of the Electron Density Difference (S1-S0) from two points of view.

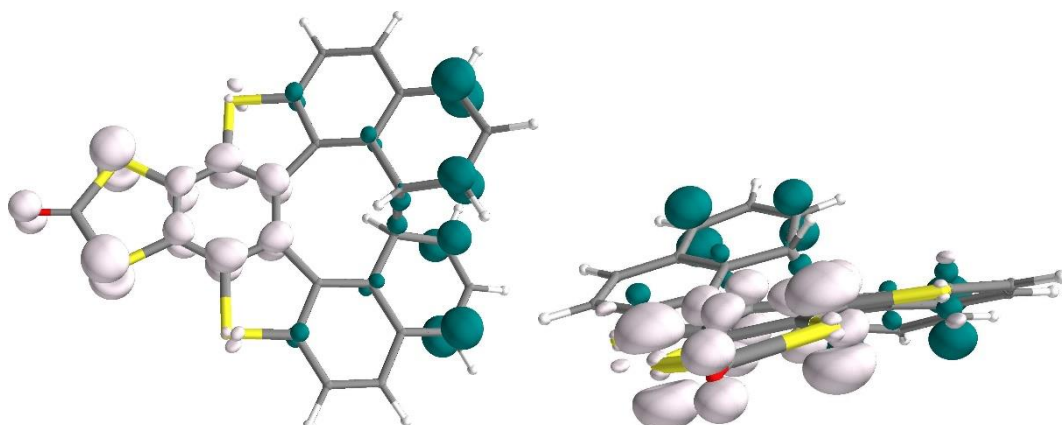

Figure 7: Representation of the Electron Density Difference (S2-S0) from two points of view.

# Molecular Calculation Report generated by quchemreport

May 31, 2022

## 1 MOLECULE

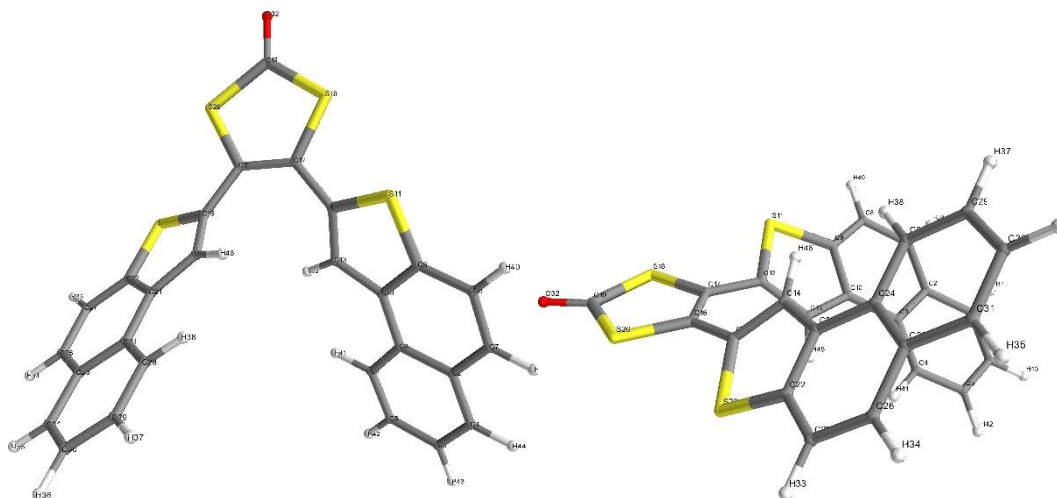

Figure 1: Chemical structure diagram with atomic numbering from two points of view.

Directory name 4-dicat-triplet  
Formula C<sub>27</sub>H<sub>14</sub>O<sub>4</sub>++  
Charge 2  
Spin multiplicity 3

## 2 COMPUTATIONAL DETAILS

|                                                         |               |             |
|---------------------------------------------------------|---------------|-------------|
| Software                                                | Gaussian      | (2009+D.01) |
| Computational method                                    | DFT           |             |
| Functional                                              | PBE1PBE       |             |
| Basis set name                                          | 6-311+G(2d,p) |             |
| Number of basis set functions                           | 980           |             |
| Closed shell calculation                                | False         |             |
| Requested SCF convergence on RMS and Max density matrix | 1e-08         | 1e-06       |
| Requested SCF convergence on energy                     | 1e-06         |             |
| Job type: Geometry optimization                         |               |             |
| Max Force value and threshold                           | 0.000018      | 0.000450    |
| RMS Force value and threshold                           | 0.000003      | 0.000300    |
| Max Displacement value and threshold                    | 0.001744      | 0.001800    |
| RMS Displacement value and threshold                    | 0.000348      | 0.001200    |

## 3 RESULTS

|                          |                      |              |
|--------------------------|----------------------|--------------|
| Total molecular energy   | -2703.21414 hartrees |              |
| Unrestricted calculation | Alpha spin MO        | Beta spin MO |
| HOMO number              | 124                  | 122          |
| LUMO+1 energies          | -7.90 eV             | -10.40 eV    |
| LUMO energies            | -8.62 eV             | -11.07 eV    |
| HOMO energies            | -12.01 eV            | -12.35 eV    |
| HOMO-1 energies          | -12.71 eV            | -12.82 eV    |

Geometry optimization specific results  
Converged nuclear repulsion energy 3574.36874 Hartrees

Table. Converged cartesian atomic coordinates in Angstroms

| Atom | X       | Y       | Z       |
|------|---------|---------|---------|
| C    | -4.8007 | 3.6641  | -0.7941 |
| C    | -4.2978 | 2.5001  | -0.1790 |
| C    | -3.1686 | 1.8436  | -0.7414 |
| C    | -2.5943 | 2.3731  | -1.8958 |
| C    | -3.1128 | 3.5233  | -2.4890 |
| C    | -4.2125 | 4.1701  | -1.9407 |
| C    | -4.9210 | 1.9832  | 0.9760  |
| C    | -4.4758 | 0.8209  | 1.5967  |
| C    | -3.3863 | 0.1673  | 1.0527  |
| C    | -2.6950 | 0.6497  | -0.0952 |
| S    | -2.7093 | -1.3120 | 1.6433  |
| C    | -1.5164 | -1.2983 | 0.3846  |
| C    | -1.6304 | -0.1895 | -0.4423 |
| C    | 1.6304  | -0.1896 | 0.4424  |
| C    | 1.5162  | -1.2984 | -0.3845 |
| C    | 0.6538  | -2.4444 | -0.2166 |
| C    | -0.6540 | -2.4444 | 0.2166  |
| S    | -1.3991 | -3.9857 | 0.4943  |
| C    | -0.0001 | -4.9988 | 0.0000  |
| S    | 1.3988  | -3.9858 | -0.4943 |
| C    | 2.6950  | 0.6495  | 0.0952  |
| C    | 3.3861  | 0.1672  | -1.0529 |
| S    | 2.7090  | -1.3121 | -1.6434 |
| C    | 3.1688  | 1.8433  | 0.7415  |
| C    | 4.2982  | 2.4996  | 0.1792  |
| C    | 4.9213  | 1.9826  | -0.9759 |
| C    | 4.4757  | 0.8207  | -1.5969 |
| C    | 2.5944  | 2.3731  | 1.8957  |
| C    | 3.1131  | 3.5232  | 2.4889  |
| C    | 4.2130  | 4.1697  | 1.9408  |
| C    | 4.8013  | 3.6635  | 0.7943  |
| O    | -0.0001 | -6.1780 | 0.0001  |
| H    | 4.9852  | 0.4380  | -2.4738 |
| H    | 5.7834  | 2.5016  | -1.3824 |
| H    | 5.6635  | 4.1584  | 0.3598  |
| H    | 4.6121  | 5.0613  | 2.4095  |
| H    | 2.6531  | 3.9101  | 3.3912  |
| H    | 1.7414  | 1.8864  | 2.3550  |
| H    | -5.7829 | 2.5024  | 1.3827  |
| H    | -4.9854 | 0.4382  | 2.4736  |
| H    | -1.7416 | 1.8861  | -2.3553 |
| H    | -2.6530 | 3.9100  | -3.3915 |
| H    | -4.6115 | 5.0618  | -2.4094 |
| H    | 0.9949  | -0.0536 | 1.3075  |

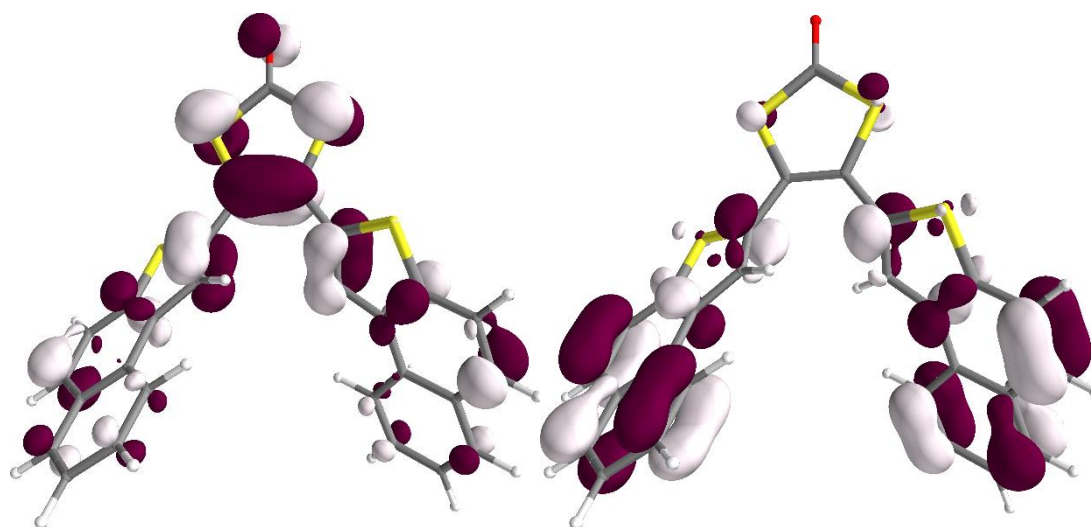

Figure 2: Representation of the two SOMO of spin alpha.
